# Supplementary material for: Extracellular microRNA and cognitive function in a prospective cohort of older men: The Veterans Affairs Normative Aging Study
Source: Aging (Albany NY). 2022 Sep 6;14(17):6859–86. doi: 10.18632/aging.204268 (PMC9512498; doi:10.18632/aging.204268)
Supplement: Supplementary Table 1 [file aging-14-204268-s002.xlsx]

## Sheet: Supplementary Table 1
Supplementary Table 1. Descriptive statistics of the 381 plasma microRNAs detected in ≥ 70% of samples. Values are normalized, batch-corrected reads (in counts per million). SD: Standard deviation. *Due to technical factors in the sequencing process as well as the post-sequencing processing options, there are cases where reads are not assigned to a single specific miRNA. Instead, it can be assign…
miRNA			Percentile
	Minimum	Maximum	25th	50th (Median)	75th	Mean	SD
hsa-let-7a-3p	1.122	296.534	55.894	75.418	96.655	78.411	36.102
hsa-let-7a-5p	8827.04	130368	41861.9	54150.7	66464.9	55195.9	17286.9
hsa-let-7b-3p	1.154	191.219	16.487	25.065	40.031	30.886	21.206
hsa-let-7b-5p	4272.14	244394	15592.3	25243.3	38782.1	32148.6	26574.4
hsa-let-7c-5p	339.928	13244.6	1561.88	2229.16	3027.09	2439.76	1193.34
hsa-let-7d-3p	19.779	7066.27	882.845	1411.69	1977.38	1582.3	1032.99
hsa-let-7d-5p	749.066	7651.36	2618.63	3220.45	3880.2	3315.63	1029.78
hsa-let-7e-5p	181.677	4032.59	799.087	1028.95	1309.78	1127.76	510.574
hsa-let-7f-1-3p	0.732	54.004	8.194	13.179	19.194	14.333	8.603
hsa-let-7f-5p	15046.2	198178	53153.3	65528.9	78429.6	67745.4	21231.9
hsa-let-7g-5p	6177.05	178628	17916	22590	28793.4	25047.9	12174.8
hsa-let-7i-5p	29012.9	151883	50601.9	61498.1	72920.6	62998	16736
hsa-miR-1-3p	28.612	31546.4	335.486	579.935	1027.6	881.637	1531.82
hsa-miR-100-5p	7.726	4464.23	258.038	448.14	699.392	534.302	415.457
hsa-miR-101-3p	1570.94	41465.2	4462.56	5787.26	7887.08	6880.63	4198.59
hsa-miR-103a-3p	71.906	11449.3	832.12	1191.91	1716.48	1435.31	1088.27
hsa-miR-106a-5p	2.021	227.754	12.05	18.735	28.34	22.102	17.285
hsa-miR-106b-3p	247.632	3119.17	642.745	771.26	941.302	838.54	341.269
hsa-miR-106b-5p	3.006	883.599	38.737	53.045	72.931	61.446	47.445
hsa-miR-107	3.738	543.577	85.945	116.742	161.824	133.205	73.475
hsa-miR-10a-3p	1.667	37.642	3.65	6.327	10.363	8.006	6.153
hsa-miR-10a-5p	164.317	49629.7	3663.19	5256.16	7007.34	5779.8	4161.71
hsa-miR-10b-3p	0.857	97.225	4.485	8.233	14.897	11.693	11.743
hsa-miR-10b-5p	18.207	221948	2553.59	5109.02	9133.44	7829.58	13257.6
hsa-miR-1180-3p	1.44	641.481	36.555	60.851	95.394	77.473	67.11
hsa-miR-122-5p	127.6	3.51543e+06	14319.8	32162.6	71619.4	73550.8	181645
hsa-miR-1246	1.82	41072.1	63.506	122.818	221.438	259.61	1628.55
hsa-miR-1255a	0.395	99.298	5.853	13.055	20.978	15.361	12.408
hsa-miR-1255b-5p	1.552	72.322	2.953	6.306	11.781	9.185	8.823
hsa-miR-125a-3p	1.639	134.279	16.324	24.343	33.722	26.724	16.101
hsa-miR-125a-5p	7.451	4759.44	481.658	818.003	1197.81	931.559	663.555
hsa-miR-125b-2-3p	1.236	557.799	5.446	10.219	16.268	13.518	23.809
hsa-miR-125b-5p	2.194	1630.24	61.203	98.955	148.085	121.934	115.752
hsa-miR-126-3p	3263.68	43891.8	18393.1	22204.2	26111.4	22406.2	6577.69
hsa-miR-126-5p	13.725	1438.04	332.114	437.522	541.012	449.193	174.243
hsa-miR-127-3p	34.913	13166.3	955.96	1676.26	2698.09	2099.31	1694.47
hsa-miR-1271-5p	0.915	64.832	2.863	6.841	11.413	8.277	6.674
hsa-miR-1273h-3p	1.956	395.28	43.593	65.565	83.993	66.893	33.927
hsa-miR-1273h-5p	0.439	57.154	5.305	10.547	16.678	12.034	8.563
hsa-miR-1278	1.301	39.998	5.094	8.868	13.13	9.804	6.43
hsa-miR-128-3p	762.78	15806.3	4670.48	6163.51	7863.39	6276.96	2314.37
hsa-miR-1284	1.735	48.298	4.036	7.307	12.048	9.027	6.922
hsa-miR-1285-3p	1.297	175.224	10.884	17.526	28.886	22.495	18.783
hsa-miR-1287-5p	1.003	49.938	6.026	10.34	15.406	11.428	7.147
hsa-miR-129-5p	1.217	76.758	5.331	10.344	16.896	12.893	10.357
hsa-miR-1292-5p	0.776	54.692	8.708	13.316	19.083	14.471	8.249
hsa-miR-1294	1.074	266.101	12.114	21.333	36.338	29.107	27.8
hsa-miR-1299	1.704	1744.66	6.076	21.611	45.254	56.276	156.235
hsa-miR-1301-3p	3.887	930.807	131.516	194.577	261.326	209.046	112.131
hsa-miR-1304-5p	1.762	46.859	3.261	6.045	9.699	7.542	6.088
hsa-miR-1306-3p	1.261	175.712	15.119	21.587	29.568	23.331	13.229
hsa-miR-1307-3p	94.928	4706.21	780.057	1049.62	1425.06	1163.24	562.934
hsa-miR-1307-5p	1.803	43.206	3.463	6.209	9.303	7.13	4.97
hsa-miR-130a-3p	1.38	196.377	21.286	30.598	41	32.341	17.228
hsa-miR-130b-3p	1.393	115.537	12.734	18.377	24.781	19.895	11.583
hsa-miR-130b-5p	0.625	963.545	74.16	146.808	234.561	167.877	123.467
hsa-miR-132-3p	0.927	69.467	6.817	11.66	17.924	13.099	8.658
hsa-miR-132-5p	1.507	47.536	4.208	7.468	12.19	9.076	6.608
hsa-miR-133a-3p	0.976	174.04	3.858	8.247	15.877	13.775	17.492
hsa-miR-134-5p	24.089	8451.55	249.379	438.275	693.9	551.271	526.057
hsa-miR-136-3p	0.871	213.58	3.23	9.374	16.084	12.474	14.138
hsa-miR-136-5p	1.33	77.119	3.515	8.305	14.324	10.457	8.971
hsa-miR-139-3p	29.222	1936.23	168.027	232.464	325.122	264.507	157.216
hsa-miR-139-5p	43.454	1842.41	353.459	477.309	622.427	515.07	237.438
hsa-miR-140-3p	461.696	11288.1	1449.83	2055.23	2641.25	2270	1250.14
hsa-miR-140-5p	10.091	449.876	94.265	124.616	152.227	127.972	53.453
hsa-miR-142-3p	43.522	1085.19	260.028	333.14	431.678	352.067	136.049
hsa-miR-142-5p	41.019	2070.1	211.67	270.388	340.244	297.031	157.977
hsa-miR-143-3p	704.194	41838.7	3568.4	4769.3	6305.29	5486.68	3451.48
hsa-miR-144-3p	1.909	1367.83	69.467	121.978	201.301	160.632	146.088
hsa-miR-144-5p	1.126	484.826	21.595	38.274	64.206	51.761	51.271
hsa-miR-145-3p	2.516	365.15	52.529	76.209	109.878	88.302	52.796
hsa-miR-1468-5p	1.088	102.715	13.56	21.492	31.684	24.411	15.836
hsa-miR-146a-5p	1335.89	29704.5	5897.89	7260.36	9150.52	7784.03	3019.61
hsa-miR-146b-3p	1.722	86.663	14.116	20.105	27.701	21.604	11.585
hsa-miR-146b-5p	1173.18	15463.6	3954.89	4857.36	5868.98	5018.3	1606.97
hsa-miR-148a-3p	15411.8	321017	49803.8	60862.6	75993.9	66943.8	30867.2
hsa-miR-148a-5p	1.832	168.837	24.015	35.771	46.978	37.182	19.445
hsa-miR-148b-3p	422.811	6962.69	1398.93	1763.57	2248.6	1909.6	764.757
hsa-miR-148b-5p	0.688	45.112	6.263	11.056	16.741	12.208	7.735
hsa-miR-150-3p	4.135	3363.72	46.697	77.207	134.683	117.862	176.707
hsa-miR-150-5p	10.718	4856.91	146.094	226.013	346.618	294.319	309.006
hsa-miR-151a-3p	5437.06	187975	28777.4	39858	52529.7	43129.7	20675.4
*hsa-miR-151a-5p or hsa-miR-151b	0.885	228.222	19.022	28.437	39.468	30.38	18.289
hsa-miR-152-3p	173.298	2451.75	509.455	679.528	850.433	713.11	297.616
hsa-miR-155-5p	16.64	10254.9	254.61	313.162	387.749	363.939	464.597
hsa-miR-15a-5p	1.43	240.831	12.479	21.805	32.676	26.208	22.033
hsa-miR-15b-3p	0.925	106.513	11.056	19.204	28.59	22.215	16.117
hsa-miR-15b-5p	2.175	492.665	50.021	75.767	116.608	90.293	61.294
hsa-miR-16-2-3p	67.484	10536.9	810.968	1078.35	1617.59	1359.76	953.666
hsa-miR-16-5p	84.734	11423.7	517.34	710.91	1039.2	900.888	767.795
hsa-miR-17-5p	11.656	1666.59	226.426	289.816	363.196	315.113	157.093
hsa-miR-181a-2-3p	8.056	510.808	61.629	84.507	111.936	91.882	48.615
hsa-miR-181a-3p	1.697	88.426	14.019	22.499	32.592	25.068	15.25
hsa-miR-181a-5p	215.39	4457.21	1209.52	1494.18	1853.45	1543.59	512.21
hsa-miR-181b-5p	18.272	680.426	162.894	209.921	255.014	216.93	77.341
hsa-miR-181c-3p	0.459	60.084	4.054	9.804	15.052	11.242	8.39
hsa-miR-181d-5p	1.806	195.049	49.555	69.601	89.467	71.193	30.647
hsa-miR-182-5p	92.094	8369.23	319.981	454.723	681.892	608.423	607.192
hsa-miR-1827	2.906	51.877	11.296	15.118	20.014	16.264	7.181
hsa-miR-183-5p	25.301	5142.66	197.943	340.249	539.796	488.594	545.788
hsa-mir-185	1.687	72.858	2.367	4.187	7.821	6.397	6.512
hsa-miR-185-3p	2.489	264.094	21.776	34.882	49.737	38.181	24.154
hsa-miR-185-5p	383.947	19237.3	2810.16	3709.36	5005.07	4198.97	2209.84
hsa-miR-186-5p	141.016	3465.68	468.923	600.013	779.038	662.542	312.04
hsa-miR-18a-3p	1.044	90.659	6.817	11.016	16.474	12.516	8.906
hsa-miR-18a-5p	1.032	100.052	7.527	13.053	18.477	14.028	9.007
hsa-miR-1908-5p	2.334	534.48	56.264	79.546	119.702	96.621	62.94
hsa-miR-191-3p	0.93	69.34	10.359	16.047	24.123	17.888	10.725
hsa-miR-191-5p	326.801	14733.3	2055.2	2887.72	3933.45	3211.8	1775.5
hsa-miR-192-5p	176.337	7990.71	715.757	1023.57	1537.85	1262.53	848.356
hsa-miR-193a-5p	6.656	1650	102.656	178.355	284.555	225.931	192.234
hsa-miR-193b-5p	0.855	560.179	8.381	16.022	28.936	26.019	38.492
hsa-miR-194-5p	11.967	1261.42	104.583	164.845	260.017	207.979	153.322
hsa-miR-195-3p	1.006	323.243	11.519	18.81	27.552	22.298	19.105
hsa-miR-195-5p	1.729	45.18	4.108	7.432	11.564	8.645	6.102
hsa-miR-196b-5p	0.506	173.214	17.889	26.259	36.606	28.024	15.405
hsa-miR-197-3p	3.185	702.968	38.372	60.496	88.825	67.901	48.68
*hsa-miR-199a-3p or hsa-miR-199b-3p	58.028	11701.8	776.242	1169.51	1681.72	1416.78	1081.95
hsa-miR-199a-5p	67.558	3340.37	572.578	865.357	1190.8	912.109	468.685
hsa-miR-199b-5p	0.85	738.161	8.477	15.144	23.813	19.687	33.79
hsa-miR-19a-3p	2.253	382.871	30.566	45.889	58.45	48.117	28.998
hsa-miR-19b-3p	1.42	1225.81	37.984	55.568	76.31	64.615	63.098
hsa-miR-200a-3p	0.9	440.194	21.049	33.457	51.379	42.266	38.397
hsa-miR-200b-3p	2.6	1295.11	19.051	29.364	41.431	34.821	55.004
hsa-miR-200c-3p	1.428	412.074	41.89	59.668	78.566	64.152	37.395
hsa-miR-203a-3p	1.581	2223.75	3.85	8.547	16.225	25.431	124.878
hsa-miR-204-5p	1.75	203.447	5.991	11.437	17.543	14.078	13.383
hsa-miR-206	1.17	2827.83	24.198	58.573	123.259	127.409	264.578
hsa-miR-20a-5p	16.066	4040.49	619.599	775.988	1001.27	862.637	418.55
hsa-miR-20b-5p	1.474	344.336	22.18	33.872	51.089	40.835	30.266
hsa-miR-21-5p	10835.2	99423.2	30216.1	37670.6	46290.1	39075	12223.7
hsa-miR-210-3p	0.914	141.221	8.422	14.511	21.305	15.957	11.093
hsa-miR-2110	6.152	922.691	130.591	172.065	225.741	190.026	91.319
hsa-miR-215-5p	1.459	1309.91	53.561	88.485	154.297	133.802	150.941
hsa-miR-219a-1-3p	1.433	53.78	3.628	6.275	9.6	7.694	6.349
hsa-miR-22-3p	661.936	11315.9	2161.9	2684.39	3524.25	2957.51	1248.36
hsa-miR-22-5p	2.24	297.636	76.072	97.739	121.101	101.359	38.524
hsa-miR-221-3p	140.939	11454	1309.68	2021.21	2848.3	2292.32	1483.33
hsa-miR-221-5p	2.509	507.317	41.69	61.005	85.52	69.051	45.613
hsa-miR-222-3p	642.687	12137.3	2293.95	3149.69	4306.75	3478.62	1637.49
hsa-miR-223-3p	1.876	7811.98	117.274	207.003	320.254	287.61	422.216
hsa-miR-223-5p	531.007	15684.6	1845.35	2218.87	2661.25	2371.63	1009.19
hsa-miR-224-5p	19.602	4070.13	287.052	464.058	754.781	611.552	521.714
hsa-miR-2355-3p	0.438	67.255	8.501	14.323	21.356	15.631	9.647
hsa-miR-23a-3p	1.104	5962.76	226.125	374.496	573.726	480.099	485.792
hsa-miR-23a-5p	0.923	152.832	3.057	7.948	14.297	10.734	10.776
hsa-miR-23b-3p	2.443	2428.87	47.331	83.231	133.083	110.363	143.814
hsa-miR-23b-5p	1.74	109.82	14.07	22.503	32.47	24.622	15.29
hsa-miR-24-1-5p	1.78	37.969	2.988	5.682	8.523	6.864	5.268
hsa-miR-24-2-5p	1.661	146.19	34.07	43.662	55.378	45.584	18.591
hsa-miR-24-3p	954.021	16100	4382.16	5146.28	6054.77	5311.49	1515.06
hsa-miR-25-3p	2832.31	68938.6	8599.77	10653	14382.2	12609.6	7095.84
hsa-miR-25-5p	1.331	244.7	16.271	24.219	36.512	28.912	19.816
hsa-miR-26a-5p	7625.44	123330	27299.9	37001.2	48672.4	39243.7	16554.6
hsa-miR-26b-3p	1.01	51.527	6.678	11.743	17.5	12.903	8.142
hsa-miR-26b-5p	388.177	7628.19	1782.85	2233	2784.64	2352.47	863.51
hsa-miR-27a-3p	621.405	24332	2605.41	3388.59	4156.51	3565.88	1619.06
hsa-miR-27a-5p	1.329	144.938	14.521	23.017	32.87	26.409	18.049
hsa-miR-27b-3p	865.691	10244.8	2835.32	3437.21	4188.33	3617.9	1156.69
hsa-miR-27b-5p	0.975	86.302	13.81	21.952	31.608	23.76	13.605
hsa-miR-28-3p	416.925	8744.85	1268.24	1607.56	1948.93	1699.39	747.687
hsa-miR-28-5p	4.324	313.163	47.061	64.451	87.682	68.614	33.295
hsa-miR-29a-3p	16.714	6355.53	194.932	259.695	358.405	318.539	325.867
hsa-miR-29b-3p	1.159	353.044	7.848	13.787	22.099	18.58	23.45
hsa-miR-29c-3p	1.676	258.514	4.456	8.193	12.865	10.638	13.635
hsa-miR-301a-5p	0.769	50.407	2.938	8.912	13.586	9.769	6.922
hsa-miR-3064-5p	1.185	45.022	4.553	7.729	11.714	8.911	5.958
hsa-miR-3074-5p	0.97	26.685	3.105	6.249	10.403	7.588	5.276
hsa-miR-30a-3p	6.344	1049.63	101.653	134.972	184.866	152.692	94.166
hsa-miR-30a-5p	107.679	10010.8	536.516	712.407	925.974	776.283	495.162
hsa-miR-30b-3p	1.253	65.239	5.643	10.231	14.407	11.029	7.582
hsa-miR-30b-5p	1.199	874.296	9.086	22.524	42.489	35.435	51.783
hsa-miR-30c-1-3p	0.49	68.014	3.931	8.389	13.044	9.563	6.856
hsa-miR-30c-2-3p	1.768	80.103	2.659	5.986	10.181	8.274	8.148
hsa-miR-30c-5p	11.13	4121.22	325.762	426.206	560.581	467.753	258.35
hsa-miR-30d-3p	0.905	51.843	4.833	8.638	12.233	9.242	5.958
hsa-miR-30d-5p	4346.6	49160.9	18062.1	21943.3	26023.5	22390.5	6194.65
hsa-miR-30e-3p	250.535	9159	997.207	1290.15	1583.46	1358.17	671.361
hsa-miR-30e-5p	126.826	3183.29	915.317	1157.44	1434.19	1197.11	410.106
hsa-miR-3120-3p	1.4	124.064	19.694	33.445	46.739	34.556	19.738
hsa-miR-3120-5p	1.741	58.855	4.249	8.873	13.252	9.684	7.016
hsa-miR-3158-3p	3.141	481.248	31.542	54.854	89.151	70.443	59.792
hsa-miR-3173-5p	1.819	50.785	2.492	5.226	9.918	7.376	6.495
hsa-miR-3174	1.386	29.341	2.503	5.959	9.299	6.783	4.645
hsa-miR-3177-3p	1.071	166.77	15.642	24.119	34.749	26.126	16.551
hsa-miR-3182	0.969	116.957	5.754	11.073	21.382	15.158	13.601
hsa-miR-3187-3p	1.677	43.061	2.978	6.007	9.803	7.357	5.591
hsa-miR-3190-3p	1.295	44.611	2.444	5.281	8.891	6.632	5.133
hsa-miR-3191-3p	0.663	34.131	2.91	6.46	10.588	7.65	5.239
hsa-miR-32-3p	0.984	37.933	2.756	6.798	10.945	7.871	5.627
hsa-miR-32-5p	2.193	307.023	59.043	76.14	94.162	79.905	36.628
hsa-mir-320a	1.465	84.033	7.862	11.75	17.377	13.868	8.745
hsa-miR-320a	2216.42	79559.1	12229.4	15640.4	19363.2	16651.5	6869.06
hsa-miR-320b	83.099	2581.28	358.623	501.014	676.144	565.331	302.059
hsa-mir-320b-1	1.482	65.631	7.982	11.451	17.342	13.739	8.643
hsa-mir-320b-2	1.839	77.274	7.663	11.439	16.908	13.424	8.39
hsa-miR-320c	22.35	724.028	128.225	174.655	246.477	201.729	108.408
hsa-mir-320c-1	1.796	18.92	2.661	3.785	5.485	4.475	2.39
hsa-mir-320c-2	1.718	43.275	2.587	3.593	5.16	4.432	3.149
hsa-miR-320d	5.11	446.826	56.9	82.47	119.633	94.803	56.406
hsa-miR-320e	1.229	77.848	14.828	20.067	27.213	22.172	10.87
hsa-miR-323a-3p	1.427	526.052	30.912	53.658	87.884	65.788	52.53
hsa-miR-323b-3p	1.663	638.398	47.477	90.076	156.315	118.653	98.119
hsa-miR-324-3p	0.956	138.514	3.42	6.761	11.332	8.7	8.598
hsa-miR-326	1.211	188.225	7.623	14.96	26.654	18.723	16.648
hsa-miR-328-3p	2.798	1812.34	243.098	381.227	531.991	395.253	207.988
hsa-miR-329-3p	0.936	89.618	3.061	8.245	15.289	10.896	10.021
hsa-miR-330-3p	9.207	998.664	162.227	224.436	298.158	238.868	114.991
hsa-miR-330-5p	0.495	57.507	9.484	15.091	20.78	15.747	8.528
hsa-miR-331-3p	0.644	72.051	3.33	7.225	14.424	10.421	9.474
hsa-miR-331-5p	0.773	64.837	7.556	12.761	17.252	13.12	7.92
hsa-miR-335-3p	2.47	866.319	106.301	176.582	253.795	190.508	116.929
hsa-miR-335-5p	1.13	225.585	31.404	45.478	59.087	47.739	26.418
hsa-miR-337-3p	0.842	66.188	3.674	10.003	19.512	13.313	11.228
hsa-miR-338-5p	3.575	332.324	40.479	53.143	69.591	59.776	35.745
hsa-miR-339-3p	2.501	502.518	56.805	72.127	88.583	75.944	38.885
hsa-miR-339-5p	0.837	89.999	12.817	22.939	36.312	26.079	16.961
hsa-miR-340-3p	1.499	538.045	83.627	124.156	170.062	133.452	70.954
hsa-miR-340-5p	149.693	3923.46	768.251	1017.17	1276.98	1054.04	397.446
hsa-miR-342-3p	2.846	486.275	33.713	56.041	84.238	67.082	48.675
hsa-miR-342-5p	33.489	11940.6	214.055	348.275	558.365	469.342	597.804
hsa-miR-345-5p	1.778	114.314	18.834	28.178	37.618	29.283	15.326
hsa-miR-3605-3p	1.172	219.402	7.602	14.047	24.607	18.809	17.755
hsa-miR-3605-5p	1.709	96.206	8.109	12.18	19.532	15.37	11.427
hsa-miR-361-3p	88.603	3825.33	354.066	447.958	544.023	472.111	219.775
hsa-miR-361-5p	1.369	184.675	29.058	43.926	61.073	48.081	26.305
hsa-miR-3615	7.893	1664.2	191.278	241.455	310.762	257.454	117.102
hsa-miR-363-3p	62.35	1730.01	305.609	425.293	597.925	484.901	262.352
hsa-miR-363-5p	1.477	74.814	7.154	11.695	17.67	13.998	10.197
hsa-miR-3679-5p	1.257	91.635	5.888	10.301	16.312	13.056	11.019
hsa-miR-369-3p	0.582	351.289	3.145	10.696	21.959	15.938	20.107
hsa-miR-369-5p	0.823	147.34	11.861	23.75	39.627	29.256	23.684
hsa-miR-370-3p	0.934	1311.85	63.942	126.507	227.966	168.334	157.036
hsa-miR-374a-3p	2.77	214.638	18.598	30.825	43.908	33.065	20.6
hsa-miR-374a-5p	0.925	386.011	31.013	47.141	64.121	51.293	31.834
hsa-miR-374b-5p	2.284	1001.25	23.739	48.534	89.348	72.86	90.752
hsa-miR-375	1.876	7556.08	125.691	253.642	483.795	448.803	723.178
hsa-miR-378a-3p	513.578	13343.1	1385.6	1814.57	2460.91	2062.67	1151.38
hsa-mir-378c	1.804	93.342	9.016	12.935	18.882	15.388	10.642
hsa-miR-378c	2.439	74.533	7.005	10.348	15.65	12.603	8.517
hsa-miR-378d	2.607	110.464	11.553	15.674	21.493	17.932	10.726
hsa-miR-378e	2.113	101.533	8.939	12.436	17.577	14.291	8.534
hsa-miR-378f	1.893	76.943	7.216	10.239	14.089	11.653	7.24
hsa-miR-378g	1.726	133.623	10.553	14.607	20.241	16.941	11.355
hsa-miR-379-5p	18.092	5282.16	307.019	526.047	842.289	663.008	566.778
hsa-miR-381-3p	1.624	1250.01	92.494	157.163	259.533	197.97	156.834
hsa-miR-382-3p	0.607	453.08	6.745	15.863	28.145	20.968	26.168
hsa-miR-382-5p	9.196	4188.57	322.167	553.966	864.305	678.296	526.637
hsa-miR-3909	1.756	44.757	3.265	6.054	9.581	7.232	5.435
hsa-miR-3913-5p	1.737	117.814	6.685	10.732	16.924	13.263	10.696
hsa-miR-3928-3p	1.005	88.204	10.119	15.985	22.303	17.148	10.635
hsa-miR-409-3p	43.976	26468.4	1121.35	2004.8	3350.75	2706.04	2477.01
hsa-miR-411-3p	0.657	160.457	11.365	21.489	34.648	26.812	23.187
hsa-miR-411-5p	0.31	943.175	22.426	42.254	71.378	55.793	58.102
hsa-miR-421	1.533	135.484	23.299	33.452	45.513	35.036	17.235
hsa-miR-423-3p	616.646	11363.8	2322.34	2994.73	3950.77	3270.36	1358.95
hsa-miR-423-5p	6228.17	235103	17144.1	24295.4	35358.6	29091.7	20716.7
hsa-miR-424-3p	5.23	387.584	63.374	89.918	121.003	95.485	48.114
hsa-miR-425-3p	1.47	336.363	28.691	44.834	68.831	53.279	38.395
hsa-miR-425-5p	15.125	1392.11	215.465	279.189	352.712	307.492	144.865
hsa-miR-4306	1.372	123.643	6.582	11.315	20.581	16.476	16.504
hsa-miR-431-5p	0.674	195.1	6.092	14.691	28.309	20.107	19.93
hsa-miR-432-5p	15.7	2184.64	233.18	399.12	649.125	480.951	350.804
hsa-miR-4326	1.036	65.614	3.189	11.491	20.266	14.039	11.456
hsa-miR-433-3p	0.769	462.951	24.477	47.189	76.826	58.117	48.838
hsa-miR-4429	3.358	255.089	28.552	37.947	50.562	41.978	21.66
hsa-miR-4433b-3p	1.028	1886.38	29.761	67.634	138.58	115.586	169.335
hsa-miR-4433b-5p	1.764	775.09	54.698	100.468	185.627	136.182	117.103
hsa-miR-4435	1.073	43.538	4.337	8.186	12.597	9.237	6.389
hsa-miR-4443	1.79	131.649	3.869	7.061	11.613	9.203	8.669
hsa-miR-4446-3p	15.08	1360.1	122.114	171.616	247.04	197.774	121.914
hsa-miR-4485-3p	1.837	239.183	3.101	6.704	12.669	10.23	15.022
hsa-miR-450a-5p	1.541	552.066	16.116	26.058	36.26	29.618	29.578
hsa-miR-450b-5p	1.479	149.896	11.115	18.614	27.928	21.925	17.264
hsa-miR-451a	1513.09	578729	19962.3	36809.5	67041.2	51897.2	50852.8
hsa-miR-452-5p	1.324	155.869	9.215	16.285	27.043	20.617	17.361
hsa-miR-454-3p	0.677	98.725	4.883	10	18.757	14.084	13.27
hsa-miR-454-5p	0.969	50.29	6.653	11.514	16.849	12.407	7.833
hsa-miR-4659b-3p	0.857	45.29	2.799	6.27	9.97	7.514	5.753
hsa-miR-4662a-5p	1.386	50.446	2.706	6.519	11.009	8.128	6.259
hsa-miR-4665-5p	0.682	345.468	8.095	13.506	19.738	15.153	15.832
hsa-miR-4732-3p	0.787	343.488	8.151	16.055	33.215	26.37	33.982
hsa-miR-4732-5p	0.712	1128	49.153	90.826	151.935	122.325	117.895
hsa-miR-4738-3p	1.644	34.858	2.437	5.428	8.721	6.597	5.196
hsa-miR-4746-5p	0.838	77.844	8.784	13.698	19.797	14.999	9.249
hsa-miR-483-5p	1.154	268.359	8.252	15.23	25.716	22.779	26.333
hsa-miR-484	52.171	1607.17	387.499	485.892	602.226	500.042	162.958
hsa-miR-485-3p	1.442	530.09	9.794	25.289	49.638	45.757	62.829
hsa-miR-485-5p	17.455	2268.24	88.251	149.783	242.464	194.819	170.813
hsa-miR-486-3p	183.135	5617.97	772.572	1039.83	1421.52	1197.66	672.613
hsa-miR-486-5p	5094.61	668914	35968.1	54660.8	88438.1	75768.7	66912.9
hsa-miR-487a-5p	1.58	65.958	3.26	9.022	16.594	12.301	11.409
hsa-miR-487b-3p	0.412	192.969	3.96	9.845	21.681	15.611	17.726
hsa-miR-493-3p	2.124	1373.61	95.957	180.077	279.043	215.72	174.805
hsa-miR-493-5p	2.656	2677.5	80.925	147.523	258.638	193.294	194.227
hsa-miR-494-3p	0.747	459.086	5.355	15.891	32.891	23.854	28.655
hsa-miR-495-3p	2.09	576.239	38.947	70.315	120.143	88.761	72.162
hsa-miR-499a-5p	1.362	153.766	13.965	23.673	36.658	29.004	22.641
hsa-miR-500a-3p	1.389	137.413	15.274	23.134	33.924	26.419	16.825
hsa-miR-501-3p	20.828	962.443	105.324	145.201	209.714	173.333	108.748
hsa-miR-5010-3p	1.076	52.442	2.841	5.766	9.481	6.907	5.113
hsa-miR-5010-5p	1.618	62.621	3.8	7.244	12.226	9.456	8.191
hsa-miR-502-3p	1.283	106.948	8.954	14.214	20.99	16.557	11.725
hsa-miR-503-5p	1.679	300.021	31.231	48.851	68.198	54.799	36.644
hsa-miR-505-3p	0.203	82.592	9.82	17.162	26.033	19.337	13.054
hsa-miR-505-5p	1.144	134.038	26.242	36.967	51.611	41.846	23.442
hsa-miR-511-5p	0.749	1065.49	29.476	51.596	86.717	71.436	83.066
hsa-miR-5189-3p	1.422	46.932	2.588	6.265	11.282	8.396	7.395
hsa-miR-5189-5p	1.218	66.645	7.415	12.044	18.601	13.859	9.457
hsa-miR-532-5p	397.774	5776.48	901.562	1107.29	1415.72	1237.13	565.365
hsa-miR-542-3p	1.581	6295.7	9.431	16.375	26.631	33.798	248.595
hsa-miR-543	25.07	3854.93	279.775	485.628	839.703	638.618	517.073
**hsa-miR-548-3p-sum	1.677	159.637	41.086	54.87	70.802	56.709	23.127
**hsa-miR-548-5p-sum	1.768	146.916	32.211	47.375	61.831	48.058	22.871
*hsa-miR-550a-3-5p or hsa-miR-550a-5p	1.109	193.266	18.515	27.183	38.836	32.864	24.822
hsa-miR-556-5p	0.923	40.147	2.793	6.683	10.619	7.886	5.475
hsa-miR-574-3p	1.092	232.474	14.269	24.753	37.853	28.93	21.576
hsa-miR-574-5p	0.522	141.06	3.834	10.731	19.418	14.886	14.831
hsa-miR-576-3p	3.511	282.014	50.929	68.872	90.09	75.976	38.512
hsa-miR-576-5p	1.187	45.755	3.707	8.17	13.351	9.78	7.317
hsa-miR-581	1.225	58.297	2.698	5.529	8.765	6.529	4.895
hsa-miR-582-3p	1.121	508.281	7.335	14.848	27.306	23.238	32.5
hsa-miR-584-5p	334.449	10119.5	1557.03	2083.48	2717.36	2242.67	983.891
hsa-miR-589-5p	2.279	228.236	30.702	41.885	56.621	46.449	25.172
hsa-miR-598-3p	1.005	156.059	9.317	14.585	21.52	15.963	10.84
hsa-miR-625-3p	9.604	2658.59	290.983	433.982	705.302	539.221	367.511
hsa-miR-625-5p	1.321	47.154	4.541	8.4	13.984	10.116	7.297
hsa-miR-628-3p	1.762	258.133	47.901	66.043	87.337	69.975	32.714
hsa-miR-628-5p	0.846	32.026	2.856	6.445	10.278	7.516	5.173
hsa-miR-629-5p	133.883	3007.06	396.347	524.813	717.117	628.138	373.368
hsa-miR-641	0.966	91.767	5.036	11.584	18.445	13.454	10.478
hsa-miR-642a-3p	1.243	180.631	4.395	9.144	16.349	12.233	12.242
hsa-miR-6503-3p	1.693	61.875	3.015	5.916	10.814	8.009	7.496
hsa-miR-651-5p	1.137	146.7	13.847	21.056	30.475	23.9	15.782
hsa-miR-6515-5p	1.256	47.773	2.68	6.983	10.68	8.041	6.005
hsa-miR-6516-5p	0.924	35.642	2.649	6.866	10.994	7.927	5.64
hsa-miR-652-3p	1.784	853.093	67.46	106.962	154.244	129.813	101.85
hsa-miR-654-3p	2.043	745.117	55.215	97.841	169.799	127.975	104.688
hsa-miR-654-5p	2.838	849.415	71.69	119.274	191.22	147.704	112.499
hsa-miR-660-5p	1.036	235.836	15.5	24.779	36.117	28.731	22.501
hsa-miR-664a-5p	30.825	549.171	158.531	196.476	234.953	202.708	67.749
hsa-miR-671-3p	6.477	685.451	77.534	132.391	207.105	148.334	92.845
hsa-miR-6721-5p	1.04	54.008	4.104	8.748	14.516	10.579	7.927
hsa-miR-6741-3p	1.755	72.051	3.24	7.315	13.513	9.815	8.641
hsa-miR-6741-5p	1.206	70.219	5.563	9.189	13.933	10.917	8.282
hsa-miR-6747-3p	1.605	73.084	5.119	10.572	17.98	13.119	10.382
hsa-miR-6772-3p	1.607	56.321	2.649	6.734	11.194	8.358	6.723
hsa-miR-6842-3p	3.239	523.165	86.312	118.757	156.459	125.365	57.617
hsa-miR-6842-5p	1.527	30.33	2.359	5.104	7.71	5.985	4.097
hsa-miR-6843-3p	1.378	107.565	6.424	11.783	18.953	13.835	10.252
hsa-miR-6852-3p	1.715	65.142	6.867	15.241	23.911	16.726	11.707
hsa-miR-6852-5p	0.782	258.28	37.658	58.737	78.903	63.528	37.233
hsa-miR-6866-5p	1.503	45.997	5.773	9.644	13.937	10.564	6.811
hsa-miR-6877-5p	1.189	59.184	2.478	5.262	9.104	6.733	5.458
hsa-miR-7-5p	164.276	3995.43	461.036	608.833	823.91	680.266	349.926
hsa-miR-708-3p	1.355	1788.53	4.022	5.524	11.431	11.712	70.192
hsa-miR-744-5p	294.038	8289.58	1324.28	1834.61	2406.64	1940.07	904.921
hsa-miR-760	1.45	494.811	34.338	46.235	64.264	52.376	32.198
hsa-miR-766-5p	1.588	123.705	16.1	24.112	34.512	27.311	17.305
hsa-miR-769-5p	3.144	362.659	41.682	56.989	77.049	62.125	33.158
hsa-miR-7706	2.958	390.161	27.573	39.819	59.421	48.264	33.419
hsa-miR-7854-3p	1.625	87.887	2.515	6.544	10.825	8.008	6.906
hsa-miR-7976	1.849	56.671	2.563	5.577	9.933	7.848	7.304
hsa-miR-873-5p	1.321	302.855	3.453	7.656	13.508	11.117	15.858
hsa-miR-874-3p	0.964	68.547	3.437	6.499	10.446	7.949	6.202
hsa-miR-877-5p	5.015	310.35	26.521	43.588	63.35	52.922	41.821
hsa-miR-889-3p	2.132	473.85	32.262	62.197	100.375	76.978	63.152
hsa-miR-9-5p	0.448	812.36	12.148	19.923	29.69	26.735	49.284
hsa-miR-92a-3p	1027.5	76538.3	10321.8	13537.1	17359.7	14731.3	7246.95
hsa-miR-92b-3p	4.918	669.582	109.181	147.999	205.648	165.009	85.02
hsa-miR-92b-5p	1.318	259.665	10.262	16.452	27.408	22.901	23.009
hsa-miR-93-5p	9.071	3414.41	314.968	416.421	540.034	468.333	267.302
hsa-miR-941	55.855	2194.16	268.842	340.001	428.097	360.973	163.494
hsa-miR-942-5p	1.256	121.5	21.935	31.404	40.054	32.975	17.131
hsa-miR-95-3p	1.258	528.761	18.329	31.259	49.572	38.984	35.189
hsa-miR-96-5p	1.84	343.025	2.219	6.237	11.88	10.196	19.081
hsa-miR-98-5p	290.699	2158.6	906.938	1099	1316	1120.41	315.056
hsa-miR-99a-5p	241.248	51888.7	1801.28	2605.41	3733.24	3062.17	2633.43
hsa-miR-99b-3p	2.589	346.813	48.581	69.352	96.532	77.719	45.072
hsa-miR-99b-5p	87.949	5635.27	1176.45	1486.92	1847.71	1569.34	664.223
