# Supplementary material for: Extracellular microRNA and cognitive function in a prospective cohort of older men: The Veterans Affairs Normative Aging Study
Source: Aging (Albany NY). 2022 Sep 6;14(17):6859–86. doi: 10.18632/aging.204268 (PMC9512498; doi:10.18632/aging.204268)
Supplement: Supplementary Table 2 [file aging-14-204268-s003.xlsx]

## Sheet: Supplementary Table 2
Supplementary Table 2. Associations between plasma miRNAs and cross-sectional Mini-Mental State Examination scores (N = 457). 381 plasma miRNAs were detected in ≥ 70% of all participants. Estimates from linear models adjusted for baseline age, education, alcohol consumption, and smoking status. MiRNAs are ordered by ascending False Discovery Rate (FDR). MiRNAs significant at FDR < 0.05 are shown …
miRNA	Pooled β Value	95% Confidence Interval	p-value	FDR q-value
hsa-miR-148a-5p	0.328342	0.15, 0.51	0.000413704	0.0476253
hsa-miR-335-3p	0.292747	0.13, 0.46	0.00044191	0.0476253
hsa-miR-30b-3p	0.268299	0.11, 0.43	0.00126352	0.0713197
hsa-miR-219a-1-3p	0.281013	0.11, 0.45	0.00132353	0.0713197
hsa-miR-30d-5p	0.651325	0.23, 1.08	0.00265965	0.095939
hsa-miR-484	0.547522	0.19, 0.9	0.00267062	0.095939
hsa-miR-26b-5p	0.518482	0.15, 0.88	0.00527371	0.142206
hsa-miR-98-5p	0.57503	0.16, 0.99	0.00639234	0.142206
hsa-miR-454-5p	0.219121	0.06, 0.38	0.00666818	0.142206
hsa-miR-152-3p	0.427968	0.11, 0.74	0.00737579	0.142206
hsa-miR-628-3p	0.300146	0.08, 0.52	0.00844029	0.142206
hsa-miR-99a-5p	-0.279476	-0.49, -0.07	0.00961692	0.142206
*hsa-miR-151a-5p or hsa-miR-151b	0.218431	0.05, 0.38	0.0101563	0.142206
hsa-miR-30d-3p	0.226415	0.05, 0.4	0.0105398	0.142206
hsa-miR-28-3p	0.446443	0.1, 0.79	0.0105683	0.142206
hsa-miR-21-5p	0.541781	0.12, 0.96	0.0109774	0.142206
hsa-miR-423-3p	0.411662	0.09, 0.73	0.0113229	0.142206
hsa-miR-4732-3p	-0.162433	-0.29, -0.04	0.0119215	0.142206
hsa-miR-339-5p	0.187577	0.04, 0.33	0.0125354	0.142206
hsa-miR-183-5p	-0.190315	-0.34, -0.04	0.0141614	0.142542
hsa-miR-191-5p	0.320481	0.06, 0.58	0.0153829	0.142542
hsa-miR-199a-5p	0.263655	0.05, 0.48	0.0157379	0.142542
hsa-miR-671-3p	0.208828	0.04, 0.38	0.015834	0.142542
hsa-miR-200a-3p	-0.210439	-0.38, -0.04	0.0158715	0.142542
hsa-miR-6842-3p	0.2965	0.05, 0.54	0.0176866	0.152489
hsa-miR-744-5p	0.321604	0.05, 0.59	0.0199197	0.161136
hsa-miR-20a-5p	0.309563	0.05, 0.57	0.0205315	0.161136
hsa-miR-18a-3p	0.187804	0.03, 0.35	0.0209641	0.161136
hsa-let-7i-5p	0.565583	0.08, 1.05	0.0216798	0.161136
hsa-miR-411-3p	0.149096	0.02, 0.28	0.0249407	0.173414
hsa-miR-28-5p	0.240727	0.03, 0.45	0.0257105	0.173414
hsa-miR-433-3p	0.141306	0.02, 0.27	0.0257454	0.173414
hsa-miR-487a-5p	0.145635	0.02, 0.28	0.0282736	0.179955
hsa-miR-26a-5p	0.329314	0.03, 0.62	0.0288631	0.179955
hsa-miR-221-3p	0.234657	0.02, 0.45	0.0292211	0.179955
hsa-miR-6516-5p	0.177646	0.01, 0.34	0.0323293	0.18838
hsa-miR-27b-5p	0.190647	0.02, 0.37	0.0323372	0.18838
hsa-miR-330-3p	0.258478	0.02, 0.5	0.0338426	0.191962
hsa-miR-20b-5p	0.176209	0.01, 0.34	0.0353039	0.193886
hsa-mir-320b-1	-0.233173	-0.45, -0.02	0.0359809	0.193886
hsa-miR-30e-3p	0.362165	0.02, 0.7	0.0374657	0.194776
hsa-miR-431-5p	0.131067	0.01, 0.25	0.0379533	0.194776
hsa-miR-18a-5p	0.174278	0.01, 0.34	0.0393753	0.197374
hsa-miR-378e	-0.23705	-0.46, -0.01	0.0407729	0.197854
hsa-miR-1246	-0.139216	-0.27, 0	0.0421208	0.197854
hsa-miR-146b-5p	0.418141	0.01, 0.82	0.0427046	0.197854
hsa-miR-328-3p	0.190063	0.01, 0.37	0.0431428	0.197854
hsa-miR-323a-3p	0.136769	0, 0.27	0.046684	0.209634
hsa-miR-103a-3p	0.233209	0, 0.46	0.0479744	0.211032
hsa-miR-329-3p	0.134888	0, 0.27	0.0511985	0.213349
hsa-miR-320d	-0.222844	-0.45, 0	0.0513545	0.213349
hsa-miR-27a-3p	-0.332759	-0.67, 0	0.0520829	0.213349
hsa-miR-23b-5p	0.161651	0, 0.33	0.0524605	0.213349
hsa-miR-495-3p	0.129302	0, 0.26	0.0580813	0.229739
hsa-miR-4662a-5p	0.150734	-0.01, 0.31	0.0586224	0.229739
hsa-miR-4433b-5p	0.121647	-0.01, 0.25	0.0598686	0.230434
hsa-miR-324-3p	0.153865	-0.01, 0.32	0.0623232	0.233574
hsa-miR-142-3p	0.286654	-0.02, 0.59	0.0646715	0.233574
hsa-let-7c-5p	-0.262483	-0.54, 0.02	0.0648229	0.233574
hsa-miR-374a-5p	0.167877	-0.01, 0.35	0.0650191	0.233574
hsa-miR-1307-3p	0.248757	-0.02, 0.52	0.0680609	0.240493
hsa-miR-425-3p	0.14773	-0.01, 0.31	0.0692826	0.240861
hsa-miR-23b-3p	0.146705	-0.01, 0.31	0.0730605	0.247666
hsa-miR-106b-3p	0.329423	-0.04, 0.69	0.0772449	0.247666
hsa-miR-95-3p	-0.146943	-0.31, 0.02	0.0779863	0.247666
hsa-miR-3177-3p	0.146213	-0.02, 0.31	0.0789005	0.247666
hsa-miR-200c-3p	0.174988	-0.02, 0.37	0.0792257	0.247666
hsa-miR-320c	-0.236015	-0.5, 0.03	0.0807371	0.247666
hsa-miR-204-5p	0.127446	-0.02, 0.27	0.0815192	0.247666
hsa-miR-451a	-0.129893	-0.28, 0.02	0.0838329	0.247666
hsa-miR-182-5p	-0.172214	-0.37, 0.02	0.083943	0.247666
hsa-miR-485-3p	0.0845491	-0.01, 0.18	0.0844526	0.247666
hsa-miR-454-3p	0.133049	-0.02, 0.28	0.0854989	0.247666
hsa-miR-6852-5p	0.154376	-0.02, 0.33	0.085547	0.247666
hsa-miR-326	0.12209	-0.02, 0.26	0.0862768	0.247666
hsa-miR-181d-5p	0.200321	-0.03, 0.43	0.0909544	0.247666
hsa-miR-652-3p	0.141645	-0.02, 0.31	0.092852	0.247666
hsa-miR-32-3p	0.139997	-0.02, 0.3	0.0936998	0.247666
hsa-miR-381-3p	0.124963	-0.02, 0.27	0.0946197	0.247666
hsa-let-7g-5p	0.284929	-0.05, 0.62	0.0948469	0.247666
hsa-miR-301a-5p	0.133766	-0.02, 0.29	0.0951015	0.247666
hsa-miR-4659b-3p	0.14274	-0.03, 0.31	0.0955557	0.247666
**hsa-miR-548-5p-sum	0.162179	-0.03, 0.35	0.0974473	0.247666
hsa-miR-185-5p	0.210721	-0.04, 0.46	0.0986838	0.247666
hsa-miR-139-3p	0.196424	-0.04, 0.43	0.0989281	0.247666
hsa-miR-1292-5p	0.147572	-0.03, 0.32	0.100685	0.247666
hsa-miR-127-3p	0.127823	-0.03, 0.28	0.101838	0.247666
hsa-miR-6843-3p	0.121401	-0.02, 0.27	0.101977	0.247666
hsa-miR-30e-5p	0.283991	-0.06, 0.62	0.102264	0.247666
hsa-miR-222-3p	0.225059	-0.05, 0.5	0.109787	0.259216
hsa-miR-378f	-0.187536	-0.42, 0.04	0.110699	0.259216
hsa-miR-574-5p	0.111904	-0.03, 0.25	0.111247	0.259216
hsa-miR-26b-3p	0.13058	-0.03, 0.29	0.112021	0.259216
hsa-miR-511-5p	-0.119282	-0.27, 0.03	0.113046	0.259216
hsa-miR-708-3p	-0.114355	-0.26, 0.03	0.11825	0.268295
hsa-miR-185-3p	0.132853	-0.04, 0.3	0.122295	0.272332
hsa-miR-93-5p	0.187733	-0.05, 0.43	0.122557	0.272332
hsa-miR-17-5p	0.207689	-0.06, 0.47	0.125761	0.275014
hsa-miR-1-3p	0.109335	-0.03, 0.25	0.126315	0.275014
hsa-miR-320b	-0.210091	-0.48, 0.06	0.127749	0.275354
hsa-miR-576-3p	-0.199567	-0.46, 0.06	0.129093	0.275497
hsa-let-7d-5p	0.287345	-0.09, 0.66	0.133519	0.280202
hsa-miR-193a-5p	-0.125758	-0.29, 0.04	0.133898	0.280202
hsa-miR-340-5p	0.245325	-0.08, 0.57	0.137148	0.283851
hsa-miR-335-5p	0.135153	-0.04, 0.31	0.138275	0.283851
hsa-miR-409-3p	0.105391	-0.04, 0.25	0.141863	0.285247
hsa-miR-148b-3p	0.263537	-0.09, 0.62	0.142148	0.285247
hsa-miR-106a-5p	0.129366	-0.04, 0.3	0.142926	0.285247
hsa-miR-330-5p	0.129079	-0.04, 0.3	0.145768	0.286642
hsa-miR-556-5p	0.124163	-0.04, 0.29	0.14649	0.286642
hsa-miR-378a-3p	-0.22617	-0.53, 0.08	0.147614	0.286642
hsa-miR-150-3p	-0.110137	-0.26, 0.04	0.151838	0.28767
hsa-miR-1827	0.196144	-0.07, 0.46	0.152556	0.28767
hsa-miR-106b-5p	0.143362	-0.05, 0.34	0.153126	0.28767
hsa-miR-4665-5p	0.114118	-0.04, 0.27	0.153482	0.28767
hsa-miR-6747-3p	0.101803	-0.04, 0.24	0.15986	0.297042
hsa-miR-5010-3p	0.122762	-0.05, 0.29	0.161432	0.297398
hsa-miR-130b-3p	-0.127434	-0.31, 0.05	0.164912	0.29934
hsa-miR-197-3p	0.115323	-0.05, 0.28	0.165263	0.29934
hsa-miR-654-3p	0.0915161	-0.04, 0.22	0.170395	0.306062
hsa-miR-99b-5p	0.197232	-0.09, 0.49	0.179498	0.319749
hsa-miR-4326	-0.0846654	-0.21, 0.04	0.183254	0.323763
hsa-mir-320b-2	-0.14926	-0.37, 0.07	0.185944	0.323893
hsa-miR-194-5p	-0.129633	-0.32, 0.06	0.186333	0.323893
hsa-miR-574-3p	0.101505	-0.05, 0.25	0.194139	0.331279
hsa-miR-450a-5p	-0.106688	-0.27, 0.05	0.194341	0.331279
hsa-mir-320c-2	-0.170496	-0.43, 0.09	0.196551	0.331279
hsa-miR-1294	-0.0898144	-0.23, 0.05	0.200435	0.331279
hsa-miR-337-3p	0.0865386	-0.05, 0.22	0.200863	0.331279
hsa-miR-3909	0.111374	-0.06, 0.28	0.202878	0.331279
hsa-miR-942-5p	0.131463	-0.07, 0.33	0.203597	0.331279
hsa-miR-3928-3p	0.103923	-0.06, 0.26	0.204223	0.331279
hsa-miR-3173-5p	0.100806	-0.05, 0.26	0.204414	0.331279
hsa-miR-584-5p	0.187108	-0.1, 0.48	0.207049	0.333045
hsa-miR-450b-5p	-0.0955761	-0.25, 0.06	0.216639	0.344336
hsa-miR-224-5p	0.0994397	-0.06, 0.26	0.217619	0.344336
hsa-miR-10b-5p	-0.081163	-0.21, 0.05	0.218861	0.344336
hsa-miR-4746-5p	0.104233	-0.06, 0.27	0.222294	0.344774
hsa-miR-6503-3p	0.09516	-0.06, 0.25	0.22335	0.344774
hsa-miR-10a-5p	-0.12954	-0.34, 0.08	0.22486	0.344774
hsa-mir-320a	-0.142068	-0.37, 0.09	0.225538	0.344774
hsa-miR-92b-3p	0.14594	-0.09, 0.38	0.227841	0.345608
hsa-miR-1273h-5p	0.0926254	-0.06, 0.24	0.230703	0.345608
hsa-miR-1285-3p	-0.0929243	-0.25, 0.06	0.232125	0.345608
hsa-miR-4446-3p	0.122703	-0.08, 0.32	0.232497	0.345608
hsa-miR-375	-0.0709237	-0.19, 0.05	0.234683	0.346468
hsa-miR-2110	-0.168273	-0.45, 0.12	0.246995	0.349981
hsa-miR-6866-5p	-0.0970272	-0.26, 0.07	0.247474	0.349981
hsa-miR-4732-5p	-0.0833951	-0.23, 0.06	0.248997	0.349981
hsa-miR-130b-5p	0.0738203	-0.05, 0.2	0.249374	0.349981
hsa-miR-30c-2-3p	0.0874869	-0.06, 0.24	0.250051	0.349981
hsa-let-7f-5p	0.255996	-0.18, 0.69	0.251379	0.349981
hsa-miR-3158-3p	-0.0919196	-0.25, 0.07	0.252189	0.349981
hsa-miR-379-5p	0.0899418	-0.06, 0.24	0.252266	0.349981
hsa-miR-6852-3p	0.0793118	-0.06, 0.22	0.252308	0.349981
hsa-miR-6842-5p	0.105877	-0.08, 0.29	0.2533	0.349981
hsa-miR-769-5p	0.121251	-0.09, 0.33	0.2558	0.351185
hsa-miR-543	0.0846681	-0.06, 0.23	0.262179	0.357664
hsa-miR-22-3p	-0.188869	-0.52, 0.14	0.267508	0.360504
hsa-miR-421	0.0982447	-0.08, 0.27	0.268607	0.360504
hsa-miR-493-3p	0.0789934	-0.06, 0.22	0.271682	0.360504
hsa-miR-223-3p	0.083785	-0.07, 0.23	0.27201	0.360504
hsa-miR-361-3p	0.182548	-0.14, 0.51	0.272872	0.360504
hsa-miR-493-5p	0.0727728	-0.06, 0.2	0.274368	0.360504
hsa-mir-185	0.0905535	-0.07, 0.25	0.277578	0.360504
hsa-miR-5189-5p	0.0829216	-0.07, 0.23	0.277775	0.360504
hsa-miR-363-3p	-0.141355	-0.4, 0.12	0.280291	0.360504
hsa-miR-140-5p	0.144937	-0.12, 0.41	0.280986	0.360504
hsa-miR-15a-5p	0.0784679	-0.07, 0.22	0.28509	0.362979
hsa-miR-1255a	-0.0759847	-0.22, 0.06	0.286283	0.362979
hsa-miR-3174	-0.0928875	-0.27, 0.08	0.290218	0.364443
hsa-miR-126-5p	0.17146	-0.15, 0.49	0.292063	0.364443
**hsa-miR-548-3p-sum	0.125693	-0.11, 0.36	0.293956	0.364443
hsa-miR-378c	-0.112334	-0.32, 0.1	0.294201	0.364443
hsa-miR-27a-5p	-0.0942594	-0.27, 0.08	0.296489	0.365178
hsa-miR-423-5p	-0.125862	-0.36, 0.11	0.299863	0.367235
hsa-miR-6741-3p	0.0720921	-0.07, 0.21	0.311144	0.375064
hsa-miR-3074-5p	0.0900592	-0.08, 0.26	0.311246	0.375064
hsa-miR-501-3p	-0.119443	-0.35, 0.11	0.311475	0.375064
hsa-miR-7976	-0.0800402	-0.24, 0.08	0.316848	0.376276
hsa-miR-651-5p	-0.0849336	-0.25, 0.08	0.319039	0.376276
hsa-miR-125b-5p	-0.0850833	-0.25, 0.08	0.320546	0.376276
hsa-miR-5010-5p	0.0760069	-0.08, 0.23	0.3247	0.376276
hsa-miR-323b-3p	0.0662299	-0.07, 0.2	0.324934	0.376276
hsa-miR-24-2-5p	0.121247	-0.12, 0.36	0.325461	0.376276
hsa-miR-125b-2-3p	-0.0750046	-0.22, 0.07	0.326995	0.376276
hsa-miR-503-5p	-0.0846604	-0.25, 0.09	0.328701	0.376276
hsa-miR-195-5p	0.0806255	-0.08, 0.24	0.330235	0.376276
hsa-miR-200b-3p	0.0792379	-0.08, 0.24	0.330487	0.376276
hsa-miR-144-5p	-0.0665089	-0.2, 0.07	0.331685	0.376276
hsa-miR-3064-5p	0.083052	-0.09, 0.25	0.33857	0.379224
hsa-miR-4429	-0.125681	-0.38, 0.13	0.338751	0.379224
hsa-miR-1301-3p	0.102571	-0.11, 0.31	0.339562	0.379224
hsa-miR-382-5p	0.0763213	-0.08, 0.23	0.344955	0.381436
hsa-miR-425-5p	0.149493	-0.16, 0.46	0.345082	0.381436
hsa-miR-30c-5p	0.131199	-0.14, 0.41	0.34781	0.382188
hsa-miR-146a-5p	0.160738	-0.18, 0.5	0.349498	0.382188
hsa-let-7b-5p	-0.0952311	-0.3, 0.11	0.354159	0.382188
hsa-miR-4738-3p	-0.0774265	-0.24, 0.09	0.355291	0.382188
hsa-miR-889-3p	0.0593749	-0.07, 0.19	0.355753	0.382188
hsa-miR-30c-1-3p	0.0785306	-0.09, 0.25	0.356401	0.382188
hsa-miR-1273h-3p	0.098182	-0.11, 0.31	0.362573	0.383428
hsa-miR-331-5p	0.0761221	-0.09, 0.24	0.363354	0.383428
hsa-miR-766-5p	-0.078593	-0.25, 0.09	0.364166	0.383428
hsa-miR-196b-5p	0.081939	-0.1, 0.26	0.364673	0.383428
hsa-miR-181a-3p	0.0811484	-0.1, 0.26	0.368631	0.385709
hsa-miR-582-3p	-0.0556884	-0.18, 0.07	0.375195	0.39068
hsa-miR-132-5p	-0.0739945	-0.24, 0.09	0.378807	0.392544
hsa-miR-136-5p	0.0620431	-0.08, 0.2	0.385334	0.397398
hsa-miR-3120-3p	0.071065	-0.09, 0.23	0.391055	0.400899
hsa-miR-142-5p	0.123319	-0.16, 0.41	0.392449	0.400899
hsa-miR-223-5p	-0.168327	-0.56, 0.22	0.395503	0.402113
hsa-miR-145-3p	-0.0944499	-0.31, 0.13	0.399283	0.403242
hsa-miR-4443	0.0687092	-0.09, 0.23	0.400839	0.403242
hsa-miR-3187-3p	-0.0708067	-0.24, 0.09	0.402226	0.403242
hsa-miR-92a-3p	0.117422	-0.16, 0.39	0.405322	0.404465
hsa-miR-1278	0.0693797	-0.1, 0.23	0.408774	0.40603
hsa-miR-4485-3p	0.0586595	-0.08, 0.2	0.410709	0.406081
hsa-miR-340-3p	0.0818171	-0.12, 0.28	0.415307	0.408752
hsa-miR-589-5p	0.0868753	-0.12, 0.3	0.418225	0.409752
*hsa-miR-550a-3-5p or hsa-miR-550a-5p	-0.0643359	-0.22, 0.09	0.424041	0.413362
hsa-miR-10a-3p	-0.0686038	-0.24, 0.1	0.426926	0.413362
hsa-miR-15b-5p	-0.070154	-0.24, 0.1	0.428172	0.413362
hsa-miR-27b-3p	-0.163478	-0.57, 0.24	0.42958	0.413362
hsa-miR-3191-3p	-0.068581	-0.24, 0.1	0.436666	0.416115
hsa-miR-16-2-3p	-0.0899001	-0.32, 0.14	0.440047	0.416115
hsa-miR-203a-3p	0.0425589	-0.07, 0.15	0.440467	0.416115
hsa-miR-873-5p	0.056436	-0.09, 0.2	0.441431	0.416115
hsa-miR-629-5p	-0.102001	-0.36, 0.16	0.444061	0.416115
hsa-miR-192-5p	-0.0888368	-0.32, 0.14	0.444263	0.416115
hsa-miR-4435	0.0624779	-0.1, 0.22	0.448426	0.416115
hsa-miR-486-5p	-0.0724936	-0.26, 0.12	0.448766	0.416115
hsa-miR-181c-3p	0.0598563	-0.1, 0.22	0.450132	0.416115
hsa-miR-342-5p	-0.0677973	-0.24, 0.11	0.451747	0.416115
hsa-miR-411-5p	0.0484418	-0.08, 0.18	0.456444	0.418086
hsa-miR-3615	0.110837	-0.18, 0.4	0.457765	0.418086
hsa-miR-494-3p	0.0444399	-0.07, 0.16	0.465708	0.423525
hsa-miR-136-3p	-0.0495058	-0.18, 0.08	0.467651	0.423525
hsa-miR-369-3p	0.0436784	-0.08, 0.16	0.474881	0.425907
hsa-miR-505-3p	0.0560475	-0.1, 0.21	0.475649	0.425907
hsa-miR-5189-3p	0.0538139	-0.09, 0.2	0.476209	0.425907
hsa-miR-320a	-0.116134	-0.44, 0.21	0.48028	0.426217
hsa-miR-576-5p	0.057282	-0.1, 0.22	0.481025	0.426217
hsa-miR-221-5p	-0.067292	-0.26, 0.12	0.483568	0.426217
hsa-miR-128-3p	0.106449	-0.19, 0.41	0.485848	0.426217
hsa-miR-99b-3p	0.0717228	-0.13, 0.27	0.486442	0.426217
hsa-miR-133a-3p	0.0446191	-0.08, 0.17	0.490726	0.42823
hsa-miR-215-5p	-0.0522846	-0.2, 0.1	0.493317	0.428754
hsa-miR-1307-5p	0.0608007	-0.11, 0.24	0.496016	0.429369
hsa-miR-760	0.067359	-0.13, 0.27	0.509569	0.437849
hsa-miR-150-5p	0.0594272	-0.12, 0.24	0.509875	0.437849
hsa-miR-664a-5p	-0.112637	-0.45, 0.23	0.513896	0.438339
hsa-miR-877-5p	-0.0557291	-0.22, 0.11	0.514513	0.438339
hsa-miR-1468-5p	0.0564577	-0.11, 0.23	0.517163	0.438862
hsa-miR-191-3p	0.0500425	-0.11, 0.21	0.528136	0.445513
hsa-miR-30b-5p	-0.0380559	-0.16, 0.08	0.529134	0.445513
hsa-miR-339-3p	0.0777852	-0.17, 0.32	0.536163	0.449674
hsa-miR-23a-3p	0.053489	-0.12, 0.22	0.540429	0.451495
hsa-miR-140-3p	0.0863914	-0.19, 0.37	0.544197	0.452888
hsa-mir-378c	-0.0628377	-0.27, 0.14	0.552529	0.458053
hsa-let-7e-5p	0.085658	-0.2, 0.38	0.563385	0.464396
hsa-miR-25-5p	0.054088	-0.13, 0.24	0.564489	0.464396
hsa-miR-1306-3p	-0.059157	-0.27, 0.15	0.573608	0.468684
hsa-miR-485-5p	0.0478389	-0.12, 0.22	0.576134	0.468684
hsa-let-7f-1-3p	0.0456843	-0.11, 0.21	0.576224	0.468684
hsa-let-7d-3p	-0.0501438	-0.23, 0.13	0.589041	0.476154
hsa-miR-452-5p	0.0388072	-0.1, 0.18	0.593964	0.476154
hsa-miR-151a-3p	0.076682	-0.21, 0.36	0.596593	0.476154
hsa-miR-641	0.0410555	-0.11, 0.19	0.59682	0.476154
hsa-miR-361-5p	0.0528859	-0.14, 0.25	0.597569	0.476154
hsa-miR-6721-5p	0.0434054	-0.12, 0.21	0.600422	0.476154
hsa-miR-3190-3p	0.0455799	-0.13, 0.22	0.601672	0.476154
hsa-miR-628-5p	0.0465791	-0.13, 0.22	0.606264	0.476154
hsa-miR-155-5p	0.0692664	-0.2, 0.33	0.607917	0.476154
hsa-miR-22-5p	0.0694607	-0.2, 0.34	0.610254	0.476154
hsa-miR-6772-3p	0.0403942	-0.12, 0.2	0.613969	0.476154
hsa-miR-941	0.0785609	-0.23, 0.38	0.614873	0.476154
*hsa-miR-199a-3p or hsa-miR-199b-3p	0.053915	-0.16, 0.26	0.615251	0.476154
hsa-miR-7-5p	-0.0720008	-0.35, 0.21	0.616336	0.476154
hsa-miR-6515-5p	0.0409699	-0.12, 0.2	0.62434	0.477363
hsa-miR-19b-3p	0.0431632	-0.13, 0.22	0.626267	0.477363
hsa-miR-193b-5p	-0.0352643	-0.18, 0.11	0.627829	0.477363
hsa-miR-92b-5p	-0.0394305	-0.2, 0.12	0.628424	0.477363
hsa-miR-374a-3p	0.040045	-0.12, 0.2	0.630608	0.477363
hsa-miR-23a-5p	0.0360462	-0.11, 0.18	0.631189	0.477363
hsa-let-7a-3p	-0.0487388	-0.25, 0.15	0.635262	0.478763
hsa-miR-29a-3p	-0.0567141	-0.3, 0.18	0.64217	0.482283
hsa-miR-9-5p	0.0327859	-0.11, 0.17	0.64659	0.483917
hsa-miR-370-3p	0.0290838	-0.1, 0.15	0.649983	0.484773
hsa-miR-143-3p	-0.0585139	-0.32, 0.2	0.657317	0.485074
hsa-mir-320c-1	0.0591933	-0.21, 0.32	0.662224	0.485074
hsa-miR-181b-5p	0.0756551	-0.26, 0.42	0.662979	0.485074
hsa-miR-30a-3p	0.054818	-0.19, 0.3	0.663058	0.485074
hsa-miR-19a-3p	0.0422295	-0.15, 0.23	0.66532	0.485074
hsa-miR-331-3p	-0.033827	-0.19, 0.12	0.667176	0.485074
hsa-miR-3913-5p	0.0331001	-0.12, 0.18	0.668256	0.485074
hsa-miR-25-3p	0.0642837	-0.23, 0.36	0.66839	0.485074
hsa-miR-4306	-0.0309664	-0.18, 0.12	0.677847	0.489562
hsa-miR-502-3p	-0.0375976	-0.22, 0.14	0.679116	0.489562
hsa-miR-100-5p	-0.0334409	-0.2, 0.13	0.689744	0.490389
hsa-miR-129-5p	-0.0328374	-0.2, 0.13	0.691918	0.490389
hsa-miR-130a-3p	0.0388457	-0.15, 0.23	0.692022	0.490389
hsa-miR-1180-3p	-0.0336962	-0.2, 0.13	0.692978	0.490389
hsa-miR-1284	-0.0325118	-0.2, 0.13	0.69633	0.490389
hsa-miR-125a-5p	-0.0315671	-0.19, 0.13	0.696834	0.490389
hsa-miR-363-5p	-0.0315563	-0.19, 0.13	0.698445	0.490389
hsa-miR-1287-5p	-0.033671	-0.2, 0.14	0.698879	0.490389
hsa-miR-320e	-0.0470329	-0.29, 0.19	0.70074	0.490389
hsa-miR-500a-3p	-0.0349382	-0.22, 0.15	0.703831	0.490958
hsa-miR-24-3p	0.082671	-0.35, 0.52	0.709024	0.492985
hsa-miR-487b-3p	-0.0241337	-0.15, 0.11	0.716183	0.493434
hsa-miR-505-5p	-0.036566	-0.24, 0.16	0.718465	0.493434
hsa-miR-598-3p	0.0307179	-0.14, 0.2	0.722012	0.493434
hsa-let-7b-3p	0.0300706	-0.14, 0.2	0.722829	0.493434
hsa-miR-126-3p	-0.0699652	-0.46, 0.32	0.723318	0.493434
hsa-miR-660-5p	-0.0288403	-0.19, 0.13	0.723405	0.493434
hsa-miR-378d	-0.0441271	-0.3, 0.21	0.731857	0.496356
hsa-miR-134-5p	0.0282211	-0.13, 0.19	0.732294	0.496356
hsa-miR-206	-0.0182657	-0.13, 0.09	0.737441	0.496424
hsa-miR-1255b-5p	0.0240727	-0.12, 0.17	0.740902	0.496424
hsa-miR-499a-5p	-0.0252812	-0.18, 0.12	0.74154	0.496424
hsa-miR-7706	0.0353439	-0.17, 0.25	0.741608	0.496424
hsa-miR-181a-2-3p	0.0431476	-0.22, 0.3	0.744037	0.496508
hsa-miR-1908-5p	0.0302115	-0.16, 0.22	0.751754	0.499739
hsa-miR-30a-5p	-0.0453854	-0.33, 0.24	0.756092	0.499739
hsa-miR-3605-3p	-0.0225303	-0.16, 0.12	0.756331	0.499739
hsa-miR-3605-5p	0.026545	-0.14, 0.2	0.758901	0.499739
hsa-miR-1304-5p	-0.0262063	-0.2, 0.14	0.761747	0.499739
hsa-miR-10b-3p	0.022136	-0.12, 0.17	0.762789	0.499739
hsa-miR-432-5p	0.0244391	-0.14, 0.19	0.770341	0.503157
hsa-miR-186-5p	-0.0437013	-0.35, 0.26	0.778753	0.506687
hsa-miR-342-3p	-0.024456	-0.2, 0.15	0.780639	0.506687
hsa-miR-148a-3p	-0.0483514	-0.39, 0.3	0.782798	0.506687
hsa-miR-874-3p	0.0215535	-0.15, 0.19	0.804759	0.51637
hsa-let-7a-5p	-0.0488526	-0.44, 0.34	0.805904	0.51637
hsa-miR-483-5p	-0.0167868	-0.15, 0.12	0.808692	0.51637
hsa-miR-1299	-0.0105716	-0.1, 0.08	0.808727	0.51637
hsa-miR-7854-3p	-0.0189241	-0.17, 0.14	0.809736	0.51637
hsa-miR-101-3p	0.0321693	-0.24, 0.3	0.814066	0.517141
hsa-miR-424-3p	-0.0253195	-0.24, 0.19	0.815743	0.517141
hsa-miR-581	0.0193612	-0.15, 0.19	0.826527	0.52244
hsa-miR-486-3p	-0.0298127	-0.3, 0.24	0.831617	0.523157
hsa-miR-122-5p	-0.0106749	-0.11, 0.09	0.832514	0.523157
hsa-miR-382-3p	0.0126954	-0.11, 0.14	0.840649	0.523866
hsa-miR-378g	-0.0232998	-0.26, 0.21	0.843759	0.523866
hsa-miR-3120-5p	-0.0153046	-0.17, 0.14	0.844766	0.523866
hsa-miR-139-5p	-0.027358	-0.31, 0.25	0.847122	0.523866
hsa-miR-2355-3p	0.015382	-0.14, 0.17	0.847945	0.523866
hsa-miR-199b-5p	-0.0142544	-0.16, 0.13	0.848226	0.523866
hsa-miR-210-3p	-0.0155431	-0.18, 0.15	0.852311	0.524885
hsa-miR-3679-5p	-0.0132918	-0.16, 0.14	0.860926	0.527819
hsa-miR-148b-5p	0.014586	-0.15, 0.18	0.861973	0.527819
hsa-miR-6877-5p	0.0143096	-0.15, 0.18	0.866381	0.529016
hsa-miR-195-3p	-0.0130909	-0.18, 0.15	0.877906	0.53395
hsa-miR-29c-3p	-0.0115069	-0.16, 0.14	0.879417	0.53395
hsa-miR-369-5p	-0.00940341	-0.14, 0.12	0.88544	0.536097
hsa-miR-1271-5p	-0.010078	-0.17, 0.15	0.901021	0.543372
hsa-miR-107	0.0146515	-0.22, 0.25	0.903455	0.543372
hsa-miR-32-5p	0.0142685	-0.22, 0.25	0.905018	0.543372
hsa-miR-532-5p	0.0199601	-0.33, 0.37	0.91058	0.544221
hsa-miR-144-3p	0.00877905	-0.15, 0.16	0.911737	0.544221
hsa-miR-24-1-5p	-0.00934133	-0.18, 0.16	0.914512	0.544221
hsa-miR-146b-3p	-0.0106314	-0.21, 0.19	0.916532	0.544221
hsa-miR-625-5p	0.00752197	-0.15, 0.17	0.927619	0.546987
hsa-miR-625-3p	0.00923358	-0.19, 0.21	0.928034	0.546987
hsa-miR-642a-3p	-0.00655681	-0.15, 0.14	0.930864	0.546987
hsa-miR-338-5p	-0.00976616	-0.23, 0.21	0.932004	0.546987
hsa-miR-16-5p	-0.00929431	-0.24, 0.22	0.936379	0.546987
hsa-miR-96-5p	0.00538644	-0.13, 0.14	0.938026	0.546987
hsa-miR-125a-3p	-0.00691944	-0.19, 0.17	0.940176	0.546987
hsa-miR-4433b-3p	-0.0032595	-0.09, 0.08	0.941492	0.546987
hsa-miR-6741-5p	0.00476126	-0.15, 0.16	0.95241	0.549815
hsa-miR-181a-5p	-0.0109662	-0.38, 0.36	0.953351	0.549815
hsa-miR-15b-3p	0.00411264	-0.15, 0.16	0.959035	0.549815
hsa-miR-132-3p	0.00411335	-0.15, 0.16	0.959436	0.549815
hsa-miR-3182	-0.00312832	-0.14, 0.13	0.964027	0.549815
hsa-miR-345-5p	0.00404635	-0.17, 0.18	0.964062	0.549815
hsa-miR-542-3p	-0.00286491	-0.13, 0.12	0.964215	0.549815
hsa-miR-374b-5p	0.00208572	-0.12, 0.12	0.973176	0.55346
hsa-miR-29b-3p	-0.00145978	-0.14, 0.14	0.984047	0.55817
hsa-miR-654-5p	-2.70647e-05	-0.15, 0.15	0.999717	0.56557
