# Supplementary material for: Extracellular microRNA and cognitive function in a prospective cohort of older men: The Veterans Affairs Normative Aging Study
Source: Aging (Albany NY). 2022 Sep 6;14(17):6859–86. doi: 10.18632/aging.204268 (PMC9512498; doi:10.18632/aging.204268)
Supplement: Supplementary Table 3 [file aging-14-204268-s004.xlsx]

## Sheet: Supplementary Table 3
Supplementary Table 3. Associations between plasma miRNAs and trajectories of Mini-Mental State Examination scores over follow up time (N = 530). 381 plasma miRNAs were detected in ≥ 70% of all participants. The beta estimate represents the beta estimate (pooled from 10 imputed datasets) for the interaction of miRNA and follow up time from linear mixed models adjusted for follow up time since bas…
miRNA	Pooled β Value	95% Confidence Interval	p-value	FDR q-value	Direction of Association
hsa-miR-28-3p	-0.090188	-0.14, -0.04	0.000233828	0.028681	-
hsa-miR-152-3p	-0.0755551	-0.12, -0.03	0.000394038	0.028681	-
hsa-miR-30e-3p	-0.0833171	-0.13, -0.04	0.000670743	0.028681	-
hsa-miR-148b-3p	-0.0748212	-0.12, -0.03	0.000808774	0.028681	-
hsa-miR-326	-0.0300981	-0.05, -0.01	0.000922007	0.028681	-
hsa-miR-22-3p	0.0799179	0.03, 0.13	0.000990678	0.028681	+
hsa-miR-221-3p	-0.0481321	-0.08, -0.02	0.00108395	0.028681	-
hsa-miR-4732-3p	0.0294874	0.01, 0.05	0.00130916	0.028681	+
hsa-miR-652-3p	-0.0359829	-0.06, -0.01	0.00136559	0.028681	-
hsa-miR-511-5p	0.0305764	0.01, 0.05	0.00140858	0.028681	+
hsa-let-7b-5p	0.0444787	0.02, 0.07	0.00159333	0.028681	+
hsa-miR-342-5p	0.0377094	0.01, 0.06	0.00168916	0.028681	+
hsa-miR-6852-5p	-0.0365006	-0.06, -0.01	0.00179364	0.028681	-
hsa-miR-574-5p	-0.0297312	-0.05, -0.01	0.00220445	0.0307631	-
hsa-miR-431-5p	-0.0251826	-0.04, -0.01	0.00249306	0.0307631	-
hsa-miR-21-5p	-0.0835242	-0.14, -0.03	0.00255942	0.0307631	-
hsa-miR-493-5p	-0.0268732	-0.04, -0.01	0.00275898	0.0307631	-
hsa-miR-320c	0.0519975	0.02, 0.09	0.00280111	0.0307631	+
hsa-miR-340-5p	-0.0696841	-0.12, -0.02	0.00281178	0.0307631	-
hsa-miR-194-5p	0.0394199	0.01, 0.07	0.00305065	0.0317077	+
hsa-miR-6842-3p	-0.0475719	-0.08, -0.02	0.00327206	0.0323895	-
hsa-miR-363-3p	0.0522845	0.02, 0.09	0.00394759	0.0373003	+
hsa-miR-584-5p	-0.0540191	-0.09, -0.02	0.00465348	0.0405985	-
hsa-miR-99a-5p	0.0407332	0.01, 0.07	0.00480103	0.0405985	+
hsa-miR-191-5p	-0.0537192	-0.09, -0.02	0.00488255	0.0405985	-
hsa-miR-337-3p	-0.0253641	-0.04, -0.01	0.00509914	0.0406456	-
hsa-miR-329-3p	-0.0259655	-0.04, -0.01	0.00529186	0.0406456	-
hsa-miR-215-5p	0.0307137	0.01, 0.05	0.00551825	0.0406456	+
hsa-miR-181a-5p	0.069346	0.02, 0.12	0.00567033	0.0406456	+
hsa-let-7f-5p	-0.0738077	-0.13, -0.02	0.00623711	0.042472	-
hsa-miR-320b	0.0492151	0.01, 0.08	0.00633376	0.042472	+
hsa-miR-199a-5p	-0.0403667	-0.07, -0.01	0.00672063	0.0436579	-
hsa-miR-125b-5p	0.0311976	0.01, 0.05	0.0078064	0.0491745	+
hsa-miR-320d	0.0383164	0.01, 0.07	0.00832799	0.0509171	+
hsa-miR-335-3p	-0.03028	-0.05, -0.01	0.00908947	0.053985	-
hsa-miR-4659b-3p	-0.0289715	-0.05, -0.01	0.0101907	0.0588445	-
hsa-miR-339-5p	-0.0268023	-0.05, -0.01	0.0112884	0.0605568	-
hsa-miR-103a-3p	-0.038162	-0.07, -0.01	0.0113818	0.0605568	-
hsa-let-7c-5p	0.0505098	0.01, 0.09	0.0118312	0.0605568	+
hsa-miR-574-3p	-0.0263655	-0.05, -0.01	0.0119142	0.0605568	-
hsa-miR-379-5p	-0.0278974	-0.05, -0.01	0.0120606	0.0605568	-
hsa-miR-1273h-5p	-0.0268105	-0.05, -0.01	0.0124014	0.0605568	-
hsa-let-7g-5p	-0.0547429	-0.1, -0.01	0.0127777	0.0605568	-
hsa-miR-151a-3p	-0.0495897	-0.09, -0.01	0.0128178	0.0605568	-
hsa-miR-27a-3p	0.0538462	0.01, 0.1	0.0140931	0.0619781	+
hsa-miR-95-3p	0.0276023	0.01, 0.05	0.0143461	0.0619781	+
hsa-miR-483-5p	0.0227579	0, 0.04	0.0144596	0.0619781	+
hsa-miR-361-3p	-0.0567577	-0.1, -0.01	0.0146039	0.0619781	-
hsa-miR-421	-0.0286285	-0.05, -0.01	0.0148075	0.0619781	-
hsa-miR-98-5p	-0.0635822	-0.11, -0.01	0.0149075	0.0619781	-
hsa-miR-451a	0.0261338	0, 0.05	0.0159863	0.06516	+
hsa-miR-335-5p	-0.0298187	-0.05, -0.01	0.0169732	0.067852	-
hsa-miR-495-3p	-0.0221511	-0.04, 0	0.0183373	0.0713041	-
hsa-miR-193b-5p	0.022277	0, 0.04	0.0186201	0.0713041	+
hsa-miR-589-5p	-0.0324698	-0.06, -0.01	0.0188658	0.0713041	-
hsa-miR-3187-3p	0.0281259	0, 0.05	0.0194216	0.071883	+
hsa-miR-369-3p	-0.019089	-0.04, 0	0.0197105	0.071883	-
hsa-miR-889-3p	-0.0198555	-0.04, 0	0.0201954	0.0723814	-
hsa-miR-16-2-3p	0.0376388	0.01, 0.07	0.0235436	0.0819174	+
hsa-miR-200a-3p	0.0276785	0, 0.05	0.0236442	0.0819174	+
hsa-miR-32-3p	-0.0265786	-0.05, 0	0.0252397	0.0860115	-
hsa-miR-200c-3p	-0.0305572	-0.06, 0	0.0267512	0.0884318	-
hsa-miR-425-3p	-0.0233744	-0.04, 0	0.0271757	0.0884318	-
hsa-miR-23a-3p	-0.0247131	-0.05, 0	0.0275383	0.0884318	-
hsa-miR-145-3p	0.0331816	0, 0.06	0.0276515	0.0884318	+
hsa-miR-223-3p	-0.0225259	-0.04, 0	0.0301726	0.0950325	-
hsa-miR-140-3p	-0.0402423	-0.08, 0	0.0315047	0.0977469	-
hsa-miR-106b-3p	-0.0563601	-0.11, 0	0.0326014	0.0978588	-
hsa-let-7i-5p	-0.0663688	-0.13, -0.01	0.0329348	0.0978588	-
hsa-miR-206	0.0153366	0, 0.03	0.032953	0.0978588	+
**hsa-miR-548-3p-sum	-0.0361416	-0.07, 0	0.034306	0.100029	-
hsa-miR-494-3p	-0.0173868	-0.03, 0	0.0346463	0.100029	-
hsa-miR-331-5p	-0.0231324	-0.04, 0	0.0355697	0.101288	-
hsa-miR-556-5p	-0.02424	-0.05, 0	0.0363065	0.10199	-
hsa-miR-1271-5p	-0.0227788	-0.04, 0	0.0374335	0.103753	-
hsa-miR-30d-5p	-0.058629	-0.11, 0	0.0384923	0.105284	-
hsa-miR-10b-5p	0.0178219	0, 0.03	0.040224	0.107118	+
hsa-miR-1292-5p	-0.0251153	-0.05, 0	0.0408256	0.107118	-
hsa-let-7f-1-3p	-0.0232814	-0.05, 0	0.0413522	0.107118	-
hsa-miR-192-5p	0.0309362	0, 0.06	0.0427463	0.107118	+
*hsa-miR-199a-3p or hsa-miR-199b-3p	-0.0287989	-0.06, 0	0.0431783	0.107118	-
hsa-miR-375	0.0159437	0, 0.03	0.0433365	0.107118	+
hsa-miR-127-3p	-0.0214586	-0.04, 0	0.0437235	0.107118	-
hsa-miR-146a-5p	-0.0473278	-0.09, 0	0.0444734	0.107118	-
hsa-miR-197-3p	-0.0218791	-0.04, 0	0.0453981	0.107118	-
hsa-miR-6843-3p	-0.0206709	-0.04, 0	0.0459841	0.107118	-
hsa-miR-1307-3p	-0.0337594	-0.07, 0	0.0460054	0.107118	-
hsa-miR-139-3p	-0.0296007	-0.06, 0	0.0461376	0.107118	-
hsa-miR-20a-5p	-0.0397019	-0.08, 0	0.046507	0.107118	-
hsa-miR-374a-5p	-0.0233516	-0.05, 0	0.0466865	0.107118	-
hsa-miR-5010-3p	-0.0239998	-0.05, 0	0.0468923	0.107118	-
*hsa-miR-151a-5p or hsa-miR-151b	-0.0244918	-0.05, 0	0.0482377	0.108994	-
hsa-miR-183-5p	0.0214526	0, 0.04	0.0533913	0.119341	+
hsa-miR-744-5p	-0.0348395	-0.07, 0	0.0539873	0.11939	-
hsa-miR-433-3p	-0.0161366	-0.03, 0	0.0574361	0.124088	-
hsa-miR-27b-5p	-0.023089	-0.05, 0	0.0583276	0.124088	-
hsa-miR-4732-5p	0.0199836	0, 0.04	0.0584757	0.124088	+
hsa-let-7d-3p	0.0236959	0, 0.05	0.0584998	0.124088	+
hsa-miR-625-3p	-0.0268181	-0.05, 0	0.0597393	0.124595	-
hsa-miR-23b-3p	-0.0210141	-0.04, 0	0.0602313	0.124595	-
hsa-miR-581	-0.0230672	-0.05, 0	0.0610364	0.124595	-
hsa-miR-150-3p	0.0183508	0, 0.04	0.0618384	0.124595	+
hsa-miR-17-5p	-0.0341273	-0.07, 0	0.061898	0.124595	-
hsa-miR-193a-5p	0.0208524	0, 0.04	0.0623348	0.124595	+
hsa-miR-505-3p	-0.0209279	-0.04, 0	0.063259	0.12473	-
**hsa-miR-548-5p-sum	-0.0251423	-0.05, 0	0.0636766	0.12473	-
hsa-miR-330-3p	-0.0311741	-0.06, 0	0.0645681	0.12473	-
hsa-miR-323a-3p	-0.016668	-0.03, 0	0.0648023	0.12473	-
hsa-miR-3928-3p	-0.0201067	-0.04, 0	0.0662413	0.124924	-
hsa-miR-454-5p	-0.0196642	-0.04, 0	0.0664662	0.124924	-
hsa-miR-374a-3p	-0.0195812	-0.04, 0	0.066706	0.124924	-
hsa-miR-493-3p	-0.0182671	-0.04, 0	0.0682093	0.126598	-
hsa-miR-1180-3p	0.0229729	0, 0.05	0.0697708	0.128335	+
hsa-miR-2110	0.0359647	0, 0.07	0.0703798	0.128335	+
hsa-miR-301a-5p	-0.0193453	-0.04, 0	0.0741363	0.132214	-
hsa-miR-18a-5p	-0.0206819	-0.04, 0	0.074751	0.132214	-
hsa-miR-760	-0.0227747	-0.05, 0	0.0751711	0.132214	-
hsa-miR-203a-3p	0.0132247	0, 0.03	0.0752754	0.132214	+
hsa-miR-941	-0.0370239	-0.08, 0	0.0756871	0.132214	-
hsa-miR-769-5p	-0.027508	-0.06, 0	0.0772539	0.133826	-
hsa-miR-148a-5p	-0.0236761	-0.05, 0	0.080811	0.138831	-
hsa-miR-122-5p	0.0111844	0, 0.02	0.081789	0.13936	+
hsa-miR-3158-3p	0.0193704	0, 0.04	0.0825268	0.139474	+
hsa-miR-93-5p	-0.0271795	-0.06, 0	0.0841583	0.141084	-
hsa-miR-26b-5p	-0.0449766	-0.1, 0.01	0.0853244	0.141701	-
hsa-miR-221-5p	-0.0211516	-0.05, 0	0.0858895	0.141701	-
hsa-miR-361-5p	-0.0214236	-0.05, 0	0.0874501	0.143031	-
hsa-miR-330-5p	-0.0214709	-0.05, 0	0.088072	0.143031	-
hsa-miR-486-5p	0.0242605	0, 0.05	0.0895356	0.144281	+
hsa-miR-185-5p	-0.0307743	-0.07, 0	0.0913925	0.14614	-
hsa-miR-26a-5p	-0.0342265	-0.07, 0.01	0.0940481	0.149239	-
hsa-miR-1246	0.0156279	0, 0.03	0.0956309	0.150601	+
hsa-miR-4433b-5p	-0.0154897	-0.03, 0	0.0977505	0.152781	-
hsa-miR-3120-3p	-0.0182812	-0.04, 0	0.0987143	0.153136	-
hsa-miR-126-5p	-0.0351461	-0.08, 0.01	0.104859	0.161464	-
hsa-miR-125a-5p	0.0167166	0, 0.04	0.106362	0.162573	+
hsa-miR-1278	-0.0183435	-0.04, 0	0.110675	0.167931	-
hsa-miR-363-5p	0.0180466	0, 0.04	0.112519	0.168006	+
hsa-miR-30b-3p	-0.0183444	-0.04, 0	0.11253	0.168006	-
hsa-miR-219a-1-3p	-0.0186506	-0.04, 0	0.113149	0.168006	-
hsa-miR-146b-5p	-0.0447466	-0.1, 0.01	0.114684	0.168937	-
hsa-miR-423-5p	0.0250405	-0.01, 0.06	0.115402	0.168937	+
hsa-miR-30c-5p	-0.0285565	-0.06, 0.01	0.117578	0.17092	-
hsa-miR-3177-3p	-0.0171255	-0.04, 0	0.119419	0.172391	-
hsa-miR-139-5p	-0.0273604	-0.06, 0.01	0.122266	0.174815	-
hsa-miR-30d-3p	-0.0188173	-0.04, 0.01	0.12278	0.174815	-
hsa-miR-181d-5p	-0.0240787	-0.05, 0.01	0.125025	0.1768	-
hsa-miR-210-3p	-0.0173527	-0.04, 0	0.126968	0.178291	-
hsa-miR-10b-3p	0.0162226	0, 0.04	0.127795	0.178291	+
hsa-miR-28-5p	-0.0242126	-0.06, 0.01	0.129367	0.178821	-
hsa-miR-454-3p	-0.0157218	-0.04, 0	0.129976	0.178821	-
hsa-miR-4746-5p	-0.0176584	-0.04, 0.01	0.130755	0.178821	-
hsa-miR-4485-3p	-0.013934	-0.03, 0	0.131982	0.179319	-
hsa-miR-186-5p	0.0331608	-0.01, 0.08	0.132895	0.179387	+
hsa-miR-4429	0.0270377	-0.01, 0.06	0.133769	0.179402	+
hsa-miR-4446-3p	-0.0204074	-0.05, 0.01	0.135023	0.179922	-
hsa-miR-331-3p	-0.0152608	-0.04, 0	0.136775	0.181096	-
hsa-miR-136-5p	-0.0140066	-0.03, 0	0.145892	0.189308	-
hsa-miR-6721-5p	-0.0161415	-0.04, 0.01	0.146068	0.189308	-
hsa-miR-25-5p	-0.0175524	-0.04, 0.01	0.148876	0.189308	-
hsa-miR-378e	0.0218345	-0.01, 0.05	0.148883	0.189308	+
hsa-miR-142-3p	-0.0319363	-0.08, 0.01	0.149066	0.189308	-
hsa-mir-320a	0.022661	-0.01, 0.05	0.149205	0.189308	+
hsa-miR-144-3p	0.0159668	-0.01, 0.04	0.149962	0.189308	+
hsa-miR-18a-3p	-0.0164837	-0.04, 0.01	0.151399	0.189308	-
hsa-miR-5189-5p	-0.0148064	-0.04, 0.01	0.151888	0.189308	-
hsa-miR-3173-5p	-0.0154742	-0.04, 0.01	0.152083	0.189308	-
hsa-miR-30a-5p	0.027371	-0.01, 0.07	0.15481	0.191554	+
hsa-mir-320b-1	0.0218119	-0.01, 0.05	0.155887	0.191746	+
hsa-miR-1-3p	-0.0139822	-0.03, 0.01	0.161488	0.197466	-
hsa-miR-374b-5p	-0.0111895	-0.03, 0	0.165494	0.201182	-
hsa-miR-499a-5p	0.01501	-0.01, 0.04	0.168296	0.202692	+
hsa-miR-1284	0.0150287	-0.01, 0.04	0.168686	0.202692	+
hsa-miR-3615	0.0252645	-0.01, 0.06	0.17006	0.203016	+
hsa-miR-411-3p	-0.0124259	-0.03, 0.01	0.170909	0.203016	-
hsa-mir-320c-2	0.0256551	-0.01, 0.06	0.177207	0.209301	+
hsa-miR-10a-5p	0.0184725	-0.01, 0.05	0.181309	0.212936	+
hsa-miR-195-5p	-0.0152091	-0.04, 0.01	0.18285	0.213539	-
hsa-miR-381-3p	-0.0132834	-0.03, 0.01	0.18594	0.215432	-
hsa-miR-425-5p	-0.026624	-0.07, 0.01	0.186543	0.215432	-
hsa-miR-30c-1-3p	-0.0144797	-0.04, 0.01	0.189633	0.21779	-
hsa-miR-6852-3p	-0.0117441	-0.03, 0.01	0.19483	0.222529	-
hsa-miR-199b-5p	-0.0133844	-0.03, 0.01	0.196632	0.22336	-
hsa-miR-20b-5p	-0.0150433	-0.04, 0.01	0.198731	0.224517	-
hsa-miR-654-3p	-0.0119131	-0.03, 0.01	0.202746	0.227816	-
hsa-miR-196b-5p	-0.0163984	-0.04, 0.01	0.207955	0.232412	-
hsa-miR-9-5p	-0.0127859	-0.03, 0.01	0.211755	0.235197	-
hsa-miR-411-5p	-0.0117316	-0.03, 0.01	0.21271	0.235197	-
hsa-miR-382-5p	-0.0144654	-0.04, 0.01	0.215076	0.236511	-
hsa-miR-30b-5p	-0.00983708	-0.03, 0.01	0.216173	0.236511	-
hsa-miR-424-3p	0.0183489	-0.01, 0.05	0.217922	0.237176	+
hsa-miR-484	-0.0340176	-0.09, 0.02	0.222789	0.237613	-
hsa-miR-125b-2-3p	0.0127474	-0.01, 0.03	0.223515	0.237613	+
hsa-miR-370-3p	-0.010913	-0.03, 0.01	0.223559	0.237613	-
hsa-miR-2355-3p	-0.0136117	-0.04, 0.01	0.22381	0.237613	-
hsa-miR-342-3p	-0.0138381	-0.04, 0.01	0.224039	0.237613	-
hsa-miR-432-5p	-0.0135313	-0.04, 0.01	0.225374	0.237816	-
hsa-miR-191-3p	-0.0126571	-0.03, 0.01	0.236394	0.248184	-
hsa-miR-4326	-0.0102804	-0.03, 0.01	0.242657	0.253479	-
hsa-miR-22-5p	0.0235969	-0.02, 0.06	0.246188	0.255096	+
hsa-miR-133a-3p	-0.0105312	-0.03, 0.01	0.24767	0.255096	-
hsa-miR-486-3p	0.0231881	-0.02, 0.06	0.247886	0.255096	+
hsa-miR-15b-3p	-0.012763	-0.03, 0.01	0.250723	0.255575	-
hsa-miR-3605-3p	0.0114391	-0.01, 0.03	0.251299	0.255575	+
hsa-miR-148a-3p	-0.026205	-0.07, 0.02	0.25204	0.255575	-
hsa-miR-24-2-5p	0.0175558	-0.01, 0.05	0.259394	0.259073	+
hsa-miR-500a-3p	-0.0126041	-0.03, 0.01	0.25951	0.259073	-
hsa-miR-452-5p	-0.0113284	-0.03, 0.01	0.263044	0.259073	-
hsa-miR-3174	-0.0134468	-0.04, 0.01	0.265055	0.259073	-
hsa-miR-4665-5p	-0.0120638	-0.03, 0.01	0.265529	0.259073	-
hsa-miR-29a-3p	0.017788	-0.01, 0.05	0.265564	0.259073	+
hsa-miR-144-5p	0.010901	-0.01, 0.03	0.265815	0.259073	+
hsa-miR-3191-3p	-0.0129248	-0.04, 0.01	0.266227	0.259073	-
hsa-miR-576-5p	-0.0119889	-0.03, 0.01	0.266706	0.259073	-
hsa-miR-181c-3p	-0.0122708	-0.03, 0.01	0.27093	0.260874	-
hsa-miR-132-3p	-0.0118279	-0.03, 0.01	0.271608	0.260874	-
hsa-miR-106a-5p	-0.0123924	-0.03, 0.01	0.272325	0.260874	-
hsa-mir-185	0.0127291	-0.01, 0.04	0.276173	0.263347	+
hsa-miR-654-5p	-0.0110801	-0.03, 0.01	0.277562	0.263463	-
hsa-miR-224-5p	-0.0117917	-0.03, 0.01	0.283633	0.268001	-
hsa-miR-3074-5p	-0.012665	-0.04, 0.01	0.285459	0.268013	-
hsa-miR-1285-3p	0.0115258	-0.01, 0.03	0.286224	0.268013	+
hsa-miR-140-5p	-0.0173269	-0.05, 0.01	0.291016	0.270875	-
hsa-miR-378g	-0.0167479	-0.05, 0.01	0.291887	0.270875	-
hsa-miR-340-3p	-0.013692	-0.04, 0.01	0.296531	0.273962	-
hsa-miR-1301-3p	-0.014487	-0.04, 0.01	0.301235	0.276238	-
hsa-miR-4662a-5p	-0.0109274	-0.03, 0.01	0.301653	0.276238	-
hsa-miR-26b-3p	-0.0123178	-0.04, 0.01	0.307138	0.279219	-
hsa-miR-106b-5p	-0.0135533	-0.04, 0.01	0.307594	0.279219	-
hsa-miR-185-3p	-0.011835	-0.03, 0.01	0.30966	0.279872	-
hsa-miR-23b-5p	-0.0110485	-0.03, 0.01	0.314016	0.280738	-
hsa-miR-323b-3p	-0.00915006	-0.03, 0.01	0.314345	0.280738	-
hsa-miR-382-3p	-0.00893031	-0.03, 0.01	0.31467	0.280738	-
hsa-miR-136-3p	-0.00937784	-0.03, 0.01	0.326101	0.288761	-
hsa-miR-1255b-5p	0.00986763	-0.01, 0.03	0.32644	0.288761	+
hsa-miR-100-5p	0.0105408	-0.01, 0.03	0.329201	0.289969	+
hsa-miR-24-3p	-0.0309506	-0.09, 0.03	0.333757	0.291553	-
hsa-miR-200b-3p	-0.010872	-0.03, 0.01	0.333804	0.291553	-
hsa-miR-1307-5p	-0.0115849	-0.04, 0.01	0.340364	0.29484	-
hsa-miR-99b-3p	-0.0134531	-0.04, 0.01	0.340405	0.29484	-
hsa-miR-1287-5p	-0.0111529	-0.03, 0.01	0.35452	0.304924	-
hsa-mir-320b-2	0.014852	-0.02, 0.05	0.358031	0.304924	+
hsa-miR-6877-5p	-0.0103291	-0.03, 0.01	0.358884	0.304924	-
hsa-miR-130a-3p	-0.0117988	-0.04, 0.01	0.35908	0.304924	-
hsa-miR-671-3p	-0.0105749	-0.03, 0.01	0.359511	0.304924	-
hsa-miR-181b-5p	0.0214608	-0.02, 0.07	0.362198	0.304924	+
*hsa-miR-550a-3-5p or hsa-miR-550a-5p	0.0101305	-0.01, 0.03	0.363617	0.304924	+
hsa-miR-339-3p	-0.0158314	-0.05, 0.02	0.363782	0.304924	-
hsa-miR-501-3p	0.0146348	-0.02, 0.05	0.376591	0.3137	+
hsa-miR-142-5p	-0.0159837	-0.05, 0.02	0.377269	0.3137	-
hsa-miR-3064-5p	-0.0103394	-0.03, 0.01	0.380663	0.314079	-
hsa-miR-132-5p	0.00978978	-0.01, 0.03	0.381077	0.314079	+
hsa-miR-130b-3p	0.0107743	-0.01, 0.03	0.382258	0.314079	+
hsa-miR-25-3p	0.0197525	-0.02, 0.06	0.384577	0.31474	+
hsa-miR-7976	0.00994357	-0.01, 0.03	0.386486	0.315062	+
hsa-miR-30e-5p	-0.0217921	-0.07, 0.03	0.392583	0.318248	-
hsa-miR-873-5p	0.00829921	-0.01, 0.03	0.393456	0.318248	+
hsa-miR-182-5p	0.0123326	-0.02, 0.04	0.398068	0.320731	+
hsa-miR-378a-3p	0.0163544	-0.02, 0.05	0.405059	0.325103	+
hsa-miR-369-5p	-0.00709292	-0.02, 0.01	0.408167	0.325781	-
hsa-miR-222-3p	-0.0151884	-0.05, 0.02	0.409038	0.325781	-
hsa-miR-1294	0.00842321	-0.01, 0.03	0.414886	0.326245	+
hsa-miR-598-3p	-0.00954393	-0.03, 0.01	0.41693	0.326245	-
hsa-miR-664a-5p	-0.0193267	-0.07, 0.03	0.417016	0.326245	-
hsa-miR-942-5p	-0.0116963	-0.04, 0.02	0.418242	0.326245	-
hsa-miR-1827	-0.0155613	-0.05, 0.02	0.419378	0.326245	-
hsa-miR-532-5p	0.0211713	-0.03, 0.07	0.419878	0.326245	+
hsa-miR-4306	0.00872006	-0.01, 0.03	0.420607	0.326245	+
hsa-miR-148b-5p	-0.00913437	-0.03, 0.01	0.423822	0.327517	-
hsa-miR-107	0.0143982	-0.02, 0.05	0.427502	0.329137	+
hsa-miR-542-3p	0.00727949	-0.01, 0.03	0.431275	0.330817	+
hsa-miR-181a-3p	-0.00918677	-0.03, 0.01	0.440115	0.336352	-
hsa-miR-181a-2-3p	0.0143781	-0.02, 0.05	0.441727	0.336352	+
hsa-miR-505-5p	0.010226	-0.02, 0.04	0.450657	0.341395	+
hsa-miR-378f	-0.0117621	-0.04, 0.02	0.451635	0.341395	-
hsa-miR-3679-5p	-0.00797581	-0.03, 0.01	0.455918	0.343385	-
hsa-miR-409-3p	-0.0068119	-0.03, 0.01	0.46599	0.349703	-
hsa-miR-92b-5p	0.0078109	-0.01, 0.03	0.470369	0.35172	+
hsa-miR-423-3p	-0.0147665	-0.06, 0.03	0.478694	0.356662	-
hsa-let-7d-5p	-0.0174783	-0.07, 0.03	0.496486	0.366367	-
hsa-miR-378c	0.00918115	-0.02, 0.04	0.496526	0.366367	+
hsa-miR-27a-5p	0.00797936	-0.02, 0.03	0.497007	0.366367	+
hsa-miR-96-5p	0.00632548	-0.01, 0.02	0.503563	0.368316	+
hsa-miR-628-5p	0.00820077	-0.02, 0.03	0.504889	0.368316	+
hsa-miR-642a-3p	0.006715	-0.01, 0.03	0.504967	0.368316	+
hsa-let-7b-3p	0.00739735	-0.01, 0.03	0.508762	0.369787	+
hsa-miR-708-3p	0.00612814	-0.01, 0.02	0.512153	0.370955	+
hsa-miR-651-5p	0.00712652	-0.01, 0.03	0.522187	0.376909	+
hsa-miR-320a	0.0139838	-0.03, 0.06	0.525711	0.378139	+
hsa-miR-7854-3p	0.00671253	-0.01, 0.03	0.533596	0.382488	+
hsa-miR-503-5p	-0.00719286	-0.03, 0.02	0.537523	0.383063	-
hsa-miR-1306-3p	0.00869621	-0.02, 0.04	0.539699	0.383063	+
hsa-miR-1273h-3p	-0.00898155	-0.04, 0.02	0.541195	0.383063	-
hsa-miR-320e	0.00954521	-0.02, 0.04	0.542325	0.383063	+
hsa-miR-1908-5p	0.00703199	-0.02, 0.03	0.543612	0.383063	+
hsa-miR-92b-3p	0.0101287	-0.02, 0.04	0.547258	0.383938	+
hsa-miR-30c-2-3p	-0.00634934	-0.03, 0.01	0.549596	0.383938	-
hsa-let-7a-5p	0.0159725	-0.04, 0.07	0.550395	0.383938	+
hsa-miR-625-5p	-0.00646178	-0.03, 0.02	0.556069	0.386598	-
hsa-miR-3182	-0.00530016	-0.02, 0.01	0.571106	0.39573	-
hsa-let-7a-3p	0.00748644	-0.02, 0.03	0.574956	0.397073	+
hsa-miR-155-5p	-0.0105561	-0.05, 0.03	0.591067	0.404271	-
hsa-miR-4433b-3p	0.00334477	-0.01, 0.02	0.591367	0.404271	+
hsa-miR-502-3p	-0.00619135	-0.03, 0.02	0.592865	0.404271	-
hsa-miR-450a-5p	0.00581088	-0.02, 0.03	0.593309	0.404271	+
hsa-miR-29c-3p	-0.00530524	-0.02, 0.01	0.596197	0.404271	-
hsa-miR-134-5p	-0.00596408	-0.03, 0.02	0.597046	0.404271	-
hsa-miR-485-5p	-0.0058252	-0.03, 0.02	0.609207	0.411166	-
hsa-miR-338-5p	-0.00741894	-0.04, 0.02	0.615106	0.413803	-
hsa-miR-30a-3p	0.00780985	-0.02, 0.04	0.617342	0.413968	+
hsa-miR-877-5p	-0.00567338	-0.03, 0.02	0.620317	0.414625	-
hsa-miR-582-3p	0.00401835	-0.01, 0.02	0.62858	0.417001	+
hsa-miR-24-1-5p	0.00570593	-0.02, 0.03	0.629589	0.417001	+
hsa-miR-99b-5p	-0.00918479	-0.05, 0.03	0.629889	0.417001	-
hsa-miR-1304-5p	0.00565239	-0.02, 0.03	0.642669	0.423193	+
hsa-miR-146b-3p	-0.00633865	-0.03, 0.02	0.643314	0.423193	-
hsa-miR-6516-5p	-0.00505442	-0.03, 0.02	0.649399	0.425848	-
hsa-miR-6842-5p	-0.00578901	-0.03, 0.02	0.653871	0.426327	-
hsa-miR-4443	0.00494036	-0.02, 0.03	0.654231	0.426327	+
hsa-miR-3190-3p	0.00532974	-0.02, 0.03	0.656586	0.426525	+
hsa-miR-3120-5p	-0.00466837	-0.03, 0.02	0.661208	0.428189	-
hsa-miR-6741-5p	-0.00458166	-0.03, 0.02	0.663541	0.428366	-
hsa-miR-766-5p	0.00500334	-0.02, 0.03	0.667752	0.428722	+
hsa-miR-150-5p	0.00494369	-0.02, 0.03	0.668218	0.428722	+
hsa-mir-378c	0.00571025	-0.02, 0.03	0.680175	0.434277	+
hsa-miR-641	-0.00432691	-0.03, 0.02	0.682714	0.434277	-
hsa-miR-101-3p	-0.00790234	-0.05, 0.03	0.683144	0.434277	-
hsa-miR-195-3p	0.004591	-0.02, 0.03	0.698611	0.442756	+
hsa-miR-92a-3p	0.00792952	-0.03, 0.05	0.708205	0.447472	+
hsa-miR-660-5p	0.00397987	-0.02, 0.03	0.715343	0.450612	+
hsa-miR-129-5p	0.00386841	-0.02, 0.03	0.725212	0.45429	+
hsa-miR-543	-0.00342302	-0.02, 0.02	0.72588	0.45429	-
hsa-miR-4435	0.00392916	-0.02, 0.03	0.727737	0.45429	+
hsa-miR-29b-3p	0.00320104	-0.02, 0.02	0.747231	0.465062	+
hsa-miR-324-3p	-0.00335436	-0.02, 0.02	0.752295	0.466816	-
hsa-miR-628-3p	-0.00448569	-0.03, 0.02	0.765508	0.473601	-
hsa-miR-19a-3p	0.0036385	-0.02, 0.03	0.771934	0.47616	+
hsa-miR-487b-3p	-0.00234342	-0.02, 0.02	0.795312	0.487388	-
hsa-miR-3913-5p	-0.00293482	-0.03, 0.02	0.795356	0.487388	-
hsa-miR-450b-5p	-0.00260479	-0.02, 0.02	0.79717	0.487388	-
hsa-miR-328-3p	-0.00357459	-0.03, 0.02	0.800618	0.48806	-
hsa-miR-874-3p	-0.0030027	-0.03, 0.02	0.803836	0.488589	-
hsa-miR-576-3p	-0.00390635	-0.04, 0.03	0.80948	0.490586	-
hsa-miR-126-3p	-0.00593438	-0.06, 0.04	0.817812	0.494194	-
hsa-miR-5189-3p	-0.00232882	-0.02, 0.02	0.825925	0.496329	-
hsa-miR-6515-5p	-0.00247731	-0.02, 0.02	0.82612	0.496329	-
hsa-miR-6747-3p	-0.00203243	-0.02, 0.02	0.8301	0.497283	-
hsa-miR-6866-5p	-0.00232365	-0.02, 0.02	0.836789	0.499699	-
hsa-miR-1468-5p	0.00224914	-0.02, 0.02	0.83894	0.499699	+
hsa-miR-5010-5p	0.00212363	-0.02, 0.02	0.84626	0.501103	+
hsa-miR-3909	-0.00225288	-0.03, 0.02	0.848316	0.501103	-
hsa-miR-125a-3p	-0.00229464	-0.03, 0.02	0.85031	0.501103	-
hsa-miR-130b-5p	0.00155692	-0.01, 0.02	0.85094	0.501103	+
hsa-miR-6772-3p	-0.00192252	-0.02, 0.02	0.859816	0.504718	-
hsa-miR-32-5p	0.00260698	-0.03, 0.03	0.864339	0.504718	+
hsa-let-7e-5p	-0.00332593	-0.04, 0.03	0.864363	0.504718	-
hsa-miR-128-3p	0.00314539	-0.03, 0.04	0.871284	0.506244	+
hsa-miR-378d	-0.0026885	-0.04, 0.03	0.871846	0.506244	-
hsa-miR-4738-3p	-0.00155553	-0.02, 0.02	0.892614	0.516504	-
hsa-miR-6741-3p	-0.00128058	-0.02, 0.02	0.895767	0.516504	-
hsa-miR-10a-3p	0.00153392	-0.02, 0.02	0.896971	0.516504	+
hsa-mir-320c-1	-0.00226583	-0.04, 0.03	0.903329	0.517215	-
hsa-miR-629-5p	-0.00211086	-0.04, 0.03	0.904376	0.517215	-
hsa-miR-345-5p	0.00149987	-0.02, 0.03	0.905669	0.517215	+
hsa-miR-143-3p	0.00186457	-0.03, 0.04	0.913471	0.520241	+
hsa-miR-19b-3p	0.00117544	-0.02, 0.03	0.925143	0.525449	+
hsa-miR-7706	0.00117083	-0.03, 0.03	0.933442	0.527534	+
hsa-miR-487a-5p	0.000741331	-0.02, 0.02	0.93389	0.527534	+
hsa-miR-204-5p	0.000655049	-0.02, 0.02	0.94772	0.533896	+
hsa-miR-16-5p	0.000901198	-0.03, 0.03	0.954301	0.53615	+
hsa-miR-223-5p	0.0012762	-0.05, 0.05	0.962653	0.539385	+
hsa-miR-1255a	-0.000364825	-0.02, 0.02	0.969047	0.541508	-
hsa-miR-7-5p	0.000718043	-0.04, 0.04	0.972709	0.542097	+
hsa-miR-15b-5p	-0.000362832	-0.02, 0.02	0.976795	0.542918	-
hsa-miR-15a-5p	-0.000176503	-0.02, 0.02	0.985852	0.544337	-
hsa-miR-23a-5p	0.000164875	-0.02, 0.02	0.986723	0.544337	+
hsa-miR-485-3p	0.000105901	-0.01, 0.01	0.987745	0.544337	+
hsa-miR-1299	6.02612e-05	-0.01, 0.01	0.991879	0.544337	+
hsa-miR-3605-5p	-0.000110099	-0.02, 0.02	0.99244	0.544337	-
hsa-miR-27b-3p	-0.000142941	-0.05, 0.05	0.995708	0.544634	-
hsa-miR-6503-3p	-2.21946e-05	-0.02, 0.02	0.998221	0.544634	-
