# Supplementary material for: Extracellular microRNA and cognitive function in a prospective cohort of older men: The Veterans Affairs Normative Aging Study
Source: Aging (Albany NY). 2022 Sep 6;14(17):6859–86. doi: 10.18632/aging.204268 (PMC9512498; doi:10.18632/aging.204268)
Supplement: Supplementary Table 4 [file aging-14-204268-s005.xlsx]

## Sheet: Supplementary Table 4
Supplementary Table 4. Pathways identified in KEGG pathway enrichment analysis of the 33 plasma microRNAs with expression levels that interacted with follow up time. This data is shown in a heatmap in Figure 4.
KEGG pathway	Adjusted p-value	# Genes	# miRNAs
Fatty acid biosynthesis	1.0E-325	3	4
ECM-receptor interaction	1.0E-325	30	7
Prion diseases	1.0E-325	9	7
Proteoglycans in cancer	1.0E-325	128	12
Hippo signaling pathway	1.0E-325	89	16
Lysine degradation	1.11022e-16	30	12
Viral carcinogenesis	4.10338e-13	102	9
Fatty acid metabolism	1.07581e-11	13	5
Glioma	5.5073e-09	41	9
Adherens junction	8.79611e-09	44	11
Cell cycle	1.2873e-07	74	7
Metabolism of xenobiotics by cytochrome P450	2.42771e-07	3	2
Hepatitis B	7.45586e-06	80	8
Pathways in cancer	2.89423e-05	192	9
Chronic myeloid leukemia	6.83345e-05	39	7
Transcriptional misregulation in cancer	8.86086e-05	86	5
p53 signaling pathway	9.24046e-05	43	9
Colorectal cancer	0.00022725	35	6
TGF-beta signaling pathway	0.00178147	47	7
FoxO signaling pathway	0.0022446	74	8
Fatty acid elongation	0.00989214	9	5
Prostate cancer	0.0111326	45	4
Oocyte meiosis	0.0161029	51	4
Signaling pathways regulating pluripotency of stem cells	0.024022	61	4
Thyroid hormone signaling pathway	0.0262913	40	4
Bacterial invasion of epithelial cells	0.0361505	37	8
Thyroid cancer	0.0451417	16	5
MicroRNAs in cancer	0.0821903	67	4
Endometrial cancer	0.0873628	23	4
Central carbon metabolism in cancer	0.126557	35	4
Small cell lung cancer	0.141813	42	4
Renal cell carcinoma	0.144423	32	3
Estrogen signaling pathway	0.160715	41	4
Melanoma	0.166345	28	4
Focal adhesion	0.196904	65	3
Steroid biosynthesis	0.224247	7	4
Protein processing in endoplasmic reticulum	0.27003	74	4
Pancreatic cancer	0.31495	28	3
Bladder cancer	0.358621	24	4
Non-small cell lung cancer	0.395715	18	2
PI3K-Akt signaling pathway	0.406197	127	5
Regulation of actin cytoskeleton	0.433201	56	2
Endocytosis	0.488068	53	3
Ubiquitin mediated proteolysis	0.517679	44	2
Prolactin signaling pathway	0.606591	24	3
MAPK signaling pathway	0.671258	66	3
Circadian rhythm	0.723829	4	1
Glycosphingolipid biosynthesis - ganglio series	0.772163	4	2
Biosynthesis of unsaturated fatty acids	0.821737	8	4
ErbB signaling pathway	0.894085	28	3
Epstein-Barr virus infection	0.929556	79	4
RNA transport	0.93396	62	3
Fatty acid degradation	0.939449	10	3
HIF-1 signaling pathway	0.962918	48	3
mRNA surveillance pathway	0.975585	28	3
Shigellosis	0.984512	5	1
Wnt signaling pathway	0.987113	11	2
AMPK signaling pathway	0.993139	30	1
Choline metabolism in cancer	0.993617	7	1
Neurotrophin signaling pathway	0.993869	26	1
Base excision repair	0.994317	5	2
RNA degradation	0.994556	24	2
Huntington's disease	0.995341	56	3
Valine, leucine and isoleucine biosynthesis	0.996096	2	3
Dorso-ventral axis formation	0.996903	12	1
Other types of O-glycan biosynthesis	0.998045	5	1
Glycosphingolipid biosynthesis - lacto and neolacto series	0.998213	2	1
Salmonella infection	0.998388	5	1
Insulin signaling pathway	0.998531	17	1
Mucin type O-Glycan biosynthesis	0.998822	7	2
Acute myeloid leukemia	0.999266	15	1
Pantothenate and CoA biosynthesis	0.999426	6	3
Adrenergic signaling in cardiomyocytes	0.999536	41	2
Glycosaminoglycan biosynthesis - chondroitin sulfate / dermatan sulfate	0.999604	3	2
Phosphatidylinositol signaling system	0.999604	10	1
Parkinson's disease	0.999781	7	2
Progesterone-mediated oocyte maturation	0.99981	18	1
Sphingolipid signaling pathway	0.999847	26	1
Endocrine and other factor-regulated calcium reabsorption	0.999853	12	1
Epithelial cell signaling in Helicobacter pylori infection	0.999863	8	1
Arrhythmogenic right ventricular cardiomyopathy (ARVC)	0.999918	5	1
Gap junction	0.999975	5	1
Axon guidance	0.999992	4	1
Valine, leucine and isoleucine degradation	0.999996	2	1
Cocaine addiction	0.999999	9	1
Amoebiasis	0.999999	7	1
Amphetamine addiction	0.999999	17	3
Glycosaminoglycan biosynthesis - heparan sulfate / heparin	1	1	2
Thyroid hormone synthesis	1	11	2
N-Glycan biosynthesis	1	4	1
Pyrimidine metabolism	1	23	1
Purine metabolism	1	5	1
Other glycan degradation	1	1	1
Sphingolipid metabolism	1	8	1
One carbon pool by folate	1	1	1
Vitamin B6 metabolism	1	1	1
Biotin metabolism	1	1	1
Folate biosynthesis	1	1	1
Terpenoid backbone biosynthesis	1	6	1
2-Oxocarboxylic acid metabolism	1	5	1
Ribosome biogenesis in eukaryotes	1	25	1
Sulfur relay system	1	4	1
Antigen processing and presentation	1	4	1
Circadian entrainment	1	5	1
Synaptic vesicle cycle	1	8	1
Vitamin digestion and absorption	1	1	1
Nicotine addiction	1	4	1
Pathogenic Escherichia coli infection	1	16	1
Chemical carcinogenesis	1	3	1
Systemic lupus erythematosus	1	10	1
Hypertrophic cardiomyopathy (HCM)	1	9	1
Sulfur metabolism	1	2	2
