# Supplementary material for: Extracellular microRNA and cognitive function in a prospective cohort of older men: The Veterans Affairs Normative Aging Study
Source: Aging (Albany NY). 2022 Sep 6;14(17):6859–86. doi: 10.18632/aging.204268 (PMC9512498; doi:10.18632/aging.204268)
Supplement: Supplementary Table 5 [file aging-14-204268-s006.xlsx]

## Sheet: Supplementary Table 5
Supplementary Table 5. Pathways identified in KEGG pathway enrichment analysis of the 82 plasma microRNAs with expression levels that interacted with follow up time in sensitivity analyses applying weighted linear mixed models using participants with no missing outcome data (N = 526).
KEGG pathway	Adjusted p-value	# Genes	# miRNAs
Prion diseases	1.0E-325	17	11
Fatty acid biosynthesis	1.0E-325	6	14
ECM-receptor interaction	1.0E-325	49	17
Fatty acid metabolism	1.0E-325	31	18
Glioma	1.0E-325	51	20
Pathways in cancer	1.0E-325	258	25
Cell cycle	1.0E-325	101	26
Viral carcinogenesis	1.0E-325	152	26
Adherens junction	1.0E-325	61	28
Proteoglycans in cancer	1.0E-325	158	30
Lysine degradation	1.0E-325	37	31
Hippo signaling pathway	1.0E-325	111	31
Hepatitis B	3.33067e-16	98	20
Chronic myeloid leukemia	5.55111e-16	58	21
p53 signaling pathway	1.77636e-15	55	25
FoxO signaling pathway	8.07914e-10	89	17
TGF-beta signaling pathway	1.52221e-08	59	16
Colorectal cancer	6.05626e-08	48	18
Bacterial invasion of epithelial cells	7.45028e-07	60	19
Protein processing in endoplasmic reticulum	8.32197e-07	126	16
Prostate cancer	1.73124e-06	64	15
Thyroid hormone signaling pathway	1.13052e-05	77	10
Bladder cancer	0.000138657	31	15
Transcriptional misregulation in cancer	0.000220649	107	12
Signaling pathways regulating pluripotency of stem cells	0.000382353	91	13
Oocyte meiosis	0.00050034	74	11
Renal cell carcinoma	0.000675914	50	11
Melanoma	0.000811177	41	13
Steroid biosynthesis	0.00128926	13	14
Focal adhesion	0.010008	116	9
Small cell lung cancer	0.0117039	57	12
Non-small cell lung cancer	0.0118049	39	11
Endocytosis	0.0121724	111	11
Thyroid cancer	0.0140652	21	12
Endometrial cancer	0.0608052	37	11
Pancreatic cancer	0.0720999	46	9
Estrogen signaling pathway	0.3	53	8
Ubiquitin mediated proteolysis	0.310439	89	10
MicroRNAs in cancer	0.321507	93	10
Regulation of actin cytoskeleton	0.379892	96	8
Prolactin signaling pathway	0.394068	34	8
MAPK signaling pathway	0.39451	105	8
Central carbon metabolism in cancer	0.450397	39	7
Neurotrophin signaling pathway	0.457447	66	5
PI3K-Akt signaling pathway	0.464671	156	10
Epstein-Barr virus infection	0.744717	99	7
Circadian rhythm	0.817328	18	5
mRNA surveillance pathway	0.879735	47	6
AMPK signaling pathway	0.886845	72	5
RNA transport	0.887672	82	6
Metabolism of xenobiotics by cytochrome P450	0.901276	3	2
Wnt signaling pathway	0.907533	61	8
HTLV-I infection	0.915736	96	3
Shigellosis	0.916921	35	6
mTOR signaling pathway	0.925038	36	6
Biosynthesis of unsaturated fatty acids	0.983952	8	7
Insulin signaling pathway	0.988464	64	5
Mucin type O-Glycan biosynthesis	0.989377	16	7
Fatty acid elongation	0.990865	13	7
Fatty acid degradation	0.994224	19	8
Sphingolipid signaling pathway	0.996913	55	6
RNA degradation	0.998569	35	6
Progesterone-mediated oocyte maturation	0.999754	53	5
Acute myeloid leukemia	0.999873	26	5
HIF-1 signaling pathway	0.999904	46	3
ErbB signaling pathway	0.999917	47	6
Axon guidance	0.999979	51	5
Spliceosome	0.999987	21	2
Long-term depression	0.999999	16	3
Huntington's disease	0.999999	59	5
Phosphatidylinositol signaling system	0.999999	24	3
Adrenergic signaling in cardiomyocytes	0.999999	52	4
Dorso-ventral axis formation	1	13	2
Arrhythmogenic right ventricular cardiomyopathy (ARVC)	1	12	4
Glycosaminoglycan biosynthesis - chondroitin sulfate / dermatan sulfate	1	8	5
Citrate cycle (TCA cycle)	1	3	1
Tryptophan metabolism	1	2	1
Selenocompound metabolism	1	4	1
D-Glutamine and D-glutamate metabolism	1	1	1
Other glycan degradation	1	1	1
Other types of O-glycan biosynthesis	1	5	1
Glycosaminoglycan degradation	1	2	1
Glycosaminoglycan biosynthesis - keratan sulfate	1	3	1
Inositol phosphate metabolism	1	2	1
Glycosphingolipid biosynthesis - ganglio series	1	1	1
Carbon metabolism	1	27	1
Biosynthesis of amino acids	1	6	1
Ribosome biogenesis in eukaryotes	1	25	1
RNA polymerase	1	9	1
Mismatch repair	1	4	1
Homologous recombination	1	7	1
SNARE interactions in vesicular transport	1	8	1
Cell adhesion molecules (CAMs)	1	8	1
Toll-like receptor signaling pathway	1	9	1
Circadian entrainment	1	2	1
Long-term potentiation	1	14	1
Synaptic vesicle cycle	1	8	1
Serotonergic synapse	1	1	1
Thyroid hormone synthesis	1	10	1
Endocrine and other factor-regulated calcium reabsorption	1	12	1
Protein digestion and absorption	1	11	1
Vitamin digestion and absorption	1	1	1
Amphetamine addiction	1	9	1
Alcoholism	1	10	1
Pathogenic Escherichia coli infection	1	16	1
Leishmaniasis	1	10	1
Measles	1	10	1
Chemical carcinogenesis	1	3	1
Systemic lupus erythematosus	1	10	1
Allograft rejection	1	3	1
Hypertrophic cardiomyopathy (HCM)	1	9	1
Purine metabolism	1	12	2
Pyrimidine metabolism	1	25	2
Lysine biosynthesis	1	1	2
Tyrosine metabolism	1	2	2
N-Glycan biosynthesis	1	16	2
Sphingolipid metabolism	1	11	2
Glycosphingolipid biosynthesis - lacto and neolacto series	1	4	2
One carbon pool by folate	1	3	2
Biotin metabolism	1	1	2
Folate biosynthesis	1	4	2
Terpenoid backbone biosynthesis	1	10	2
2-Oxocarboxylic acid metabolism	1	6	2
Fanconi anemia pathway	1	11	2
NF-kappa B signaling pathway	1	10	2
Sulfur relay system	1	4	2
Apoptosis	1	20	2
Platelet activation	1	40	2
Antigen processing and presentation	1	7	2
TNF signaling pathway	1	27	2
Parkinson's disease	1	6	2
Amoebiasis	1	12	2
Valine, leucine and isoleucine degradation	1	15	3
Glycosaminoglycan biosynthesis - heparan sulfate / heparin	1	4	3
Vitamin B6 metabolism	1	2	3
DNA replication	1	18	3
Vasopressin-regulated water reabsorption	1	13	3
Morphine addiction	1	14	3
Salmonella infection	1	34	3
Choline metabolism in cancer	1	30	3
Sulfur metabolism	1	2	4
Base excision repair	1	13	4
Gap junction	1	19	4
Cocaine addiction	1	19	4
Hepatitis C	1	44	4
Pantothenate and CoA biosynthesis	1	6	5
Valine, leucine and isoleucine biosynthesis	1	2	7
